# Supplementary material for: Inter- and Intra-Patient Repeatability of Radiomic Features from Multiparametric Whole-Body MRI in Patients with Metastatic Prostate Cancer
Source: MDPI journal article supplement (doi:10.3390/cancers16091647), 2024-04-25
Supplement: s1 [file s1]

## Supplementary S1

Pyradiomics definitions file for ADC radiomic features calculations.

imageType:

Original: {}

featureClass:

firstorder:

shape:

glcm:

- 'Autocorrelation'
- 'JointAverage'
- 'ClusterProminence'
- 'ClusterShade'
- 'ClusterTendency'
- 'Contrast'
- 'Correlation'
- 'DifferenceAverage'
- 'DifferenceEntropy'
- 'DifferenceVariance'
- 'JointEnergy'
- 'JointEntropy'
- 'Imc1'
- 'Imc2'
- 'Idm'
- 'Idmn'
- 'Id'
- 'Idn'
- 'InverseVariance'
- 'MaximumProbability'
- 'SumEntropy'
- 'SumSquares'

glrlm:

glszm:

glcm:

ngtdm:

setting:

normalize: false

interpolator: 'sitkLinear'

resampledPixelSpacing: [1.6796875, 1.6796875, 6.0]  
padDistance: 10  
preCrop: true  
minimumROISize: 10  
force2D: true  
force2Ddimension: 2  
binWidth: 100  
voxelArrayShift: 0  
symmetricalGLCM: true

## Supplementary S2

Pyradiomics definitions file for fat fraction radiomic features calculations.

imageType:

Original: {}

featureClass:

firstorder:

shape:

glcm:

- 'Autocorrelation'
- 'JointAverage'
- 'ClusterProminence'
- 'ClusterShade'
- 'ClusterTendency'
- 'Contrast'
- 'Correlation'
- 'DifferenceAverage'
- 'DifferenceEntropy'
- 'DifferenceVariance'
- 'JointEnergy'
- 'JointEntropy'
- 'Imc1'
- 'Imc2'
- 'Idm'
- 'Idmn'
- 'Id'
- 'Idn'
- 'InverseVariance'
- 'MaximumProbability'
- 'SumEntropy'
- 'SumSquares'

glrlm:

glszm:

glzm:

ngtdm:

setting:

normalize: false

interpolator: 'sitkLinear'

resampledPixelSpacing: [1.6796875, 1.6796875, 5.0]

padDistance: 10

preCrop: true  
minimumROISize: 10  
force2D: true  
force2Ddimension: 2  
binWidth: 3.333  
voxelArrayShift: 0  
symmetricalGLCM: true

### Supplementary S3

Below is the Stan script for drawing parameter samples given input data.

```
data {  
  int<lower=0> N_tot; // Total number of samples (lesions)  
  int<lower=0> N;    // Number of patients  
  int<lower=0> M[N]; // Number of samples per patient (Note sum(M) == N)  
  vector[N_tot] x1; // Baseline measurements 1  
  vector[N_tot] x2; // Baseline measurements 2  
}  
  
parameters {  
  real mu_0;          // Population mean  
  real<lower=0> sigma_0; // Inter-patient variation standard deviation  
  vector[N] mu_i;     // Patient means  
  real<lower=0> sigma_p; // Intra-patient variation standard deviation  
  vector[N_tot] mu_ij; // Lesion means  
  real<lower=0> sigma_r; // Repeatability standard deviation  
  real bias;          // Bias between double baseline measurements  
}  
  
model {  
  // Priors  
  mu_0 ~ normal(0, 10);  
  bias ~ normal(0, 10);  
  sigma_0 ~ cauchy(0, 5);  
  sigma_p ~ cauchy(0, 5);  
  sigma_r ~ cauchy(0, 5);  
  
  // Likelihoods  
  int pos = 1;  
  for (n in 1:N) {  
    mu_i[n] ~ normal(mu_0, sigma_0);  
    for (m in pos:pos+M[n]-1) {  
      mu_ij[m] ~ normal(mu_i[n], sigma_p);  
      x1[m] ~ normal(mu_ij[m], sigma_r);  
      x2[m] ~ normal(mu_ij[m] + bias, sigma_r);  
    }  
    pos = pos + M[n];  
  }  
}
```
