# Supplementary material for: Inter- and Intra-Patient Repeatability of Radiomic Features from Multiparametric Whole-Body MRI in Patients with Metastatic Prostate Cancer
Source: MDPI journal article supplement (doi:10.3390/cancers16091647), 2024-04-25
Supplement: s1 [file s1]

firstorder

| Name                        | ICC inter<br>(95% CI) | ICC intra<br>(95% CI) | wLCV<br>(95% CI)        | blCV<br>(95% CI)       | bCV<br>(95% CI)       | RC<br>(95% CI)       | bias<br>(95% CI)       | -LoA (%)<br>(95% CI)       | +LoA (%)<br>(95% CI)       | R-hat<br>(range)     |
|-----------------------------|-----------------------|-----------------------|-------------------------|------------------------|-----------------------|----------------------|------------------------|----------------------------|----------------------------|----------------------|
| 10Percentile                | 0.52<br>(0.05, 0.90)  | 0.83<br>(0.71, 0.90)  | 0.20<br>(0.16, 0.27)    | 0.36<br>(0.27, 0.51)   | 0.16<br>(0.03, 0.45)  | 0.49<br>(0.41, 0.61) | -0.01<br>(-0.08, 0.07) | -38.97<br>(-45.92, -33.48) | 63.84<br>(50.32, 84.91)    | 1.00<br>(1.00, 1.01) |
| 90Percentile                | 0.68<br>(0.14, 0.93)  | 0.87<br>(0.77, 0.93)  | 0.04<br>(0.03, 0.05)    | 0.10<br>(0.08, 0.13)   | 0.06<br>(0.02, 0.13)  | 0.29<br>(0.24, 0.36) | 0.02<br>(-0.02, 0.07)  | -25.13<br>(-30.24, -21.27) | 33.56<br>(27.01, 43.36)    | 1.00<br>(1.00, 1.00) |
| Energy                      | 0.41<br>(0.04, 0.89)  | 0.88<br>(0.78, 0.93)  | 0.03<br>(0.02, 0.04)    | 0.07<br>(0.06, 0.09)   | 0.02<br>(0.01, 0.08)  | 0.83<br>(0.68, 1.04) | 0.03<br>(-0.10, 0.15)  | -56.26<br>(-64.65, -49.24) | 128.60<br>(96.99, 182.87)  | 1.00<br>(1.00, 1.01) |
| Entropy                     | 0.66<br>(0.14, 0.92)  | 0.84<br>(0.72, 0.91)  | 0.07<br>(0.06, 0.09)    | 0.15<br>(0.12, 0.19)   | 0.09<br>(0.03, 0.22)  | 0.16<br>(0.13, 0.21) | 0.01<br>(-0.02, 0.03)  | -15.07<br>(-18.57, -12.58) | 17.74<br>(14.39, 22.81)    | 1.00<br>(1.00, 1.00) |
| InterquartileRange          | 0.59<br>(0.15, 0.90)  | 0.81<br>(0.67, 0.89)  | 0.07<br>(0.06, 0.09)    | 0.15<br>(0.11, 0.19)   | 0.09<br>(0.03, 0.21)  | 0.36<br>(0.29, 0.45) | 0.03<br>(-0.02, 0.09)  | -29.98<br>(-36.01, -25.53) | 42.82<br>(34.27, 56.27)    | 1.00<br>(1.00, 1.00) |
| Kurtosis                    | 0.09<br>(0.00, 0.51)  | 0.25<br>(0.02, 0.51)  | 0.29<br>(0.24, 0.37)    | 0.16<br>(0.05, 0.26)   | 0.09<br>(0.02, 0.27)  | 1.33<br>(1.10, 1.65) | 0.00<br>(-0.20, 0.20)  | -73.66<br>(-80.78, -66.68) | 279.69<br>(200.09, 420.27) | 1.00<br>(1.00, 1.01) |
| Maximum                     | 0.26<br>(0.01, 0.70)  | 0.32<br>(0.04, 0.57)  | 0.09<br>(0.07, 0.11)    | 0.06<br>(0.02, 0.09)   | 0.05<br>(0.01, 0.13)  | 0.85<br>(0.70, 1.06) | 0.02<br>(-0.10, 0.15)  | -57.38<br>(-65.20, -50.45) | 134.62<br>(101.81, 187.36) | 1.00<br>(1.00, 1.01) |
| Mean                        | 0.70<br>(0.14, 0.94)  | 0.90<br>(0.82, 0.94)  | 0.05<br>(0.04, 0.06)    | 0.14<br>(0.11, 0.18)   | 0.07<br>(0.02, 0.18)  | 0.27<br>(0.22, 0.34) | 0.01<br>(-0.03, 0.05)  | -23.87<br>(-28.87, -20.09) | 31.36<br>(25.14, 40.59)    | 1.00<br>(1.00, 1.00) |
| MeanAbsoluteDeviation       | 0.56<br>(0.09, 0.88)  | 0.77<br>(0.61, 0.87)  | 0.11<br>(0.09, 0.13)    | 0.18<br>(0.14, 0.24)   | 0.11<br>(0.03, 0.28)  | 0.37<br>(0.31, 0.47) | 0.02<br>(-0.03, 0.08)  | -31.08<br>(-37.24, -26.32) | 45.10<br>(35.72, 59.35)    | 1.00<br>(1.00, 1.00) |
| Median                      | 0.71<br>(0.10, 0.95)  | 0.92<br>(0.87, 0.96)  | 0.05<br>(0.04, 0.06)    | 0.16<br>(0.12, 0.20)   | 0.07<br>(0.01, 0.19)  | 0.25<br>(0.21, 0.32) | 0.02<br>(-0.02, 0.05)  | -22.42<br>(-27.10, -18.86) | 28.91<br>(23.24, 37.18)    | 1.00<br>(1.00, 1.01) |
| Minimum                     | 0.07<br>(0.00, 0.50)  | 0.38<br>(0.08, 0.60)  | 16.42<br>(4.59, 348.75) | 4.31<br>(1.06, 117.49) | 0.81<br>(0.14, 13.91) | 2.44<br>(2.00, 3.04) | 0.17<br>(-0.21, 0.50)  | N/A                        | N/A                        | 1.01<br>(1.00, 1.02) |
| Range                       | 0.25<br>(0.01, 0.71)  | 0.33<br>(0.03, 0.58)  | 0.09<br>(0.07, 0.11)    | 0.06<br>(0.02, 0.09)   | 0.05<br>(0.01, 0.13)  | 0.85<br>(0.69, 1.05) | 0.02<br>(-0.11, 0.14)  | -57.11<br>(-65.01, -49.83) | 133.13<br>(99.31, 185.82)  | 1.00<br>(1.00, 1.01) |
| RobustMeanAbsoluteDeviation | 0.60<br>(0.10, 0.91)  | 0.82<br>(0.70, 0.90)  | 0.15<br>(0.12, 0.19)    | 0.28<br>(0.21, 0.38)   | 0.15<br>(0.04, 0.40)  | 0.33<br>(0.28, 0.42) | 0.02<br>(-0.03, 0.07)  | -28.38<br>(-34.28, -24.10) | 39.63<br>(31.75, 52.16)    | 1.00<br>(1.00, 1.00) |
| RootMeanSquared             | 0.65<br>(0.09, 0.92)  | 0.86<br>(0.75, 0.92)  | 0.05<br>(0.04, 0.06)    | 0.12<br>(0.09, 0.16)   | 0.07<br>(0.02, 0.16)  | 0.31<br>(0.26, 0.39) | 0.02<br>(-0.03, 0.06)  | -26.72<br>(-32.18, -22.55) | 36.46<br>(29.11, 47.45)    | 1.00<br>(1.00, 1.00) |
| Skewness                    | 0.05<br>(0.00, 0.45)  | 0.26<br>(0.04, 0.52)  | 0.63<br>(0.48, 2.97)    | 0.30<br>(0.12, 0.51)   | 0.12<br>(0.02, 0.44)  | 1.79<br>(1.47, 2.19) | -0.04<br>(-0.29, 0.22) | N/A                        | N/A                        | 1.00<br>(1.00, 1.01) |
| TotalEnergy                 | 0.37<br>(0.01, 0.88)  | 0.88<br>(0.78, 0.93)  | 0.02<br>(0.02, 0.03)    | 0.06<br>(0.05, 0.08)   | 0.02<br>(0.00, 0.06)  | 0.82<br>(0.68, 1.03) | 0.03<br>(-0.09, 0.15)  | -56.17<br>(-64.33, -49.49) | 128.17<br>(97.97, 180.33)  | 1.00<br>(1.00, 1.01) |
| Uniformity                  | 0.63<br>(0.10, 0.91)  | 0.86<br>(0.75, 0.92)  | 0.07<br>(0.05, 0.08)    | 0.15<br>(0.12, 0.20)   | 0.08<br>(0.02, 0.19)  | 0.27<br>(0.22, 0.34) | -0.01<br>(-0.06, 0.03) | -23.64<br>(-28.81, -19.95) | 30.97<br>(24.92, 40.48)    | 1.00<br>(1.00, 1.00) |
| Variance                    | 0.47<br>(0.07, 0.84)  | 0.68<br>(0.47, 0.82)  | 0.11<br>(0.09, 0.13)    | 0.15<br>(0.11, 0.20)   | 0.10<br>(0.03, 0.24)  | 0.91<br>(0.75, 1.13) | 0.04<br>(-0.09, 0.18)  | -59.71<br>(-67.85, -52.69) | 148.23<br>(111.37, 211.01) | 1.00<br>(1.00, 1.00) |

glcm

| Name               | ICC inter<br>(95% CI) | ICC intra<br>(95% CI) | wLCV<br>(95% CI)       | blCV<br>(95% CI)      | bCV<br>(95% CI)       | RC<br>(95% CI)          | bias<br>(95% CI)       | -LoA (%)<br>(95% CI)       | +LoA (%)<br>(95% CI)         | R-hat<br>(range)     |
|--------------------|-----------------------|-----------------------|------------------------|-----------------------|-----------------------|-------------------------|------------------------|----------------------------|------------------------------|----------------------|
| Autocorrelation    | 0.68<br>(0.12, 0.94)  | 0.90<br>(0.81, 0.94)  | 0.08<br>(0.06, 0.10)   | 0.21<br>(0.17, 0.27)  | 0.10<br>(0.03, 0.27)  | 0.45<br>(0.37, 0.56)    | 0.01<br>(-0.06, 0.07)  | -36.14<br>(-42.98, -30.94) | 56.59<br>(44.80, 75.38)      | 1.00<br>(1.00, 1.01) |
| ClusterProminence  | 0.28<br>(0.03, 0.71)  | 0.44<br>(0.14, 0.66)  | 0.20<br>(0.17, 0.26)   | 0.17<br>(0.09, 0.25)  | 0.12<br>(0.03, 0.30)  | 2.61<br>(2.14, 3.28)    | 0.05<br>(-0.34, 0.45)  | -92.62<br>(-96.24, -88.29) | 1255.62<br>(753.94, 2561.16) | 1.00<br>(1.00, 1.00) |
| ClusterShade       | 0.08<br>(0.00, 0.43)  | 0.12<br>(0.01, 0.39)  | 7.43<br>(1.45, 199.81) | 0.75<br>(0.16, 12.88) | 0.42<br>(0.09, 1.83)  | 81.40<br>(67.64, 97.13) | 4.96<br>(-7.03, 17.42) | N/A                        | N/A                          | 1.00<br>(1.00, 1.01) |
| ClusterTendency    | 0.50<br>(0.10, 0.84)  | 0.67<br>(0.46, 0.81)  | 0.22<br>(0.18, 0.29)   | 0.27<br>(0.20, 0.38)  | 0.18<br>(0.06, 0.44)  | 0.84<br>(0.69, 1.05)    | 0.05<br>(-0.07, 0.17)  | -56.93<br>(-65.18, -49.92) | 132.19<br>(99.67, 187.19)    | 1.00<br>(1.00, 1.00) |
| Contrast           | 0.64<br>(0.17, 0.91)  | 0.76<br>(0.60, 0.87)  | 1.34<br>(0.52, 27.05)  | 0.57<br>(0.40, 2.76)  | 0.35<br>(0.12, 0.96)  | 0.78<br>(0.65, 0.98)    | 0.04<br>(-0.08, 0.15)  | -54.37<br>(-62.43, -47.63) | 119.16<br>(90.95, 166.20)    | 1.00<br>(1.00, 1.00) |
| Correlation        | 0.20<br>(0.01, 0.63)  | 0.39<br>(0.09, 0.62)  | 0.85<br>(0.49, 14.09)  | 0.37<br>(0.17, 0.61)  | 0.22<br>(0.05, 0.59)  | 0.32<br>(0.27, 0.41)    | 0.01<br>(-0.04, 0.06)  | N/A                        | N/A                          | 1.00<br>(1.00, 1.01) |
| DifferenceAverage  | 0.66<br>(0.20, 0.92)  | 0.80<br>(0.65, 0.89)  | 3.68<br>(1.17, 78.15)  | 3.34<br>(1.21, 89.29) | 0.90<br>(0.31, 7.72)  | 0.40<br>(0.33, 0.50)    | 0.01<br>(-0.05, 0.07)  | -32.96<br>(-39.31, -27.93) | 49.16<br>(38.75, 64.76)      | 1.00<br>(1.00, 1.00) |
| DifferenceEntropy  | 0.69<br>(0.17, 0.93)  | 0.79<br>(0.64, 0.88)  | 0.12<br>(0.10, 0.15)   | 0.21<br>(0.16, 0.28)  | 0.16<br>(0.05, 0.38)  | 0.20<br>(0.16, 0.24)    | 0.01<br>(-0.02, 0.04)  | -17.72<br>(-21.55, -14.88) | 21.54<br>(17.48, 27.47)      | 1.00<br>(1.00, 1.01) |
| DifferenceVariance | 0.61<br>(0.19, 0.89)  | 0.70<br>(0.50, 0.83)  | 5.78<br>(1.82, 121.33) | 3.83<br>(1.27, 81.67) | 1.37<br>(0.49, 23.64) | 0.78<br>(0.64, 0.99)    | 0.05<br>(-0.06, 0.17)  | -54.24<br>(-62.84, -47.24) | 118.52<br>(89.55, 169.14)    | 1.00<br>(1.00, 1.00) |
| Id                 | 0.61<br>(0.08, 0.90)  | 0.80<br>(0.66, 0.88)  | 0.12<br>(0.09, 0.14)   | 0.22<br>(0.17, 0.28)  | 0.13<br>(0.03, 0.33)  | 0.17<br>(0.14, 0.21)    | -0.00<br>(-0.03, 0.02) | -15.52<br>(-18.99, -12.95) | 18.37<br>(14.88, 23.44)      | 1.00<br>(1.00, 1.00) |
| Idm                | 0.58<br>(0.11, 0.89)  | 0.79<br>(0.64, 0.88)  | 0.15<br>(0.12, 0.19)   | 0.26<br>(0.20, 0.34)  | 0.16<br>(0.05, 0.37)  | 0.24<br>(0.20, 0.30)    | -0.00<br>(-0.04, 0.04) | -21.60<br>(-26.00, -18.15) | 27.55<br>(22.17, 35.14)      | 1.00<br>(1.00, 1.00) |
| Idmn               | 0.18<br>(0.01, 0.61)  | 0.39<br>(0.11, 0.61)  | 0.12<br>(0.10, 0.15)   | 0.09<br>(0.05, 0.14)  | 0.06<br>(0.01, 0.15)  | 1.26<br>(1.03, 1.58)    | 0.02<br>(-0.18, 0.20)  | -71.71<br>(-79.43, -64.12) | 253.49<br>(178.74, 386.04)   | 1.00<br>(1.00, 1.01) |
| Idn                | 0.21<br>(0.02, 0.64)  | 0.44<br>(0.18, 0.65)  | 0.10<br>(0.08, 0.12)   | 0.08<br>(0.05, 0.12)  | 0.05<br>(0.01, 0.12)  | 0.63<br>(0.51, 0.78)    | 0.00<br>(-0.09, 0.10)  | -46.62<br>(-54.04, -40.17) | 87.34<br>(67.14, 117.57)     | 1.00<br>(1.00, 1.00) |
| Imc1               | 0.12<br>(0.00, 0.63)  | 0.69<br>(0.51, 0.83)  | 0.12<br>(0.10, 0.14)   | 0.17<br>(0.13, 0.22)  | 0.04<br>(0.01, 0.14)  | 0.71<br>(0.58, 0.88)    | -0.03<br>(-0.14, 0.07) | -50.63<br>(-58.40, -44.12) | 102.57<br>(78.96, 140.37)    | 1.00<br>(1.00, 1.00) |
| Imc2               | 0.13<br>(0.01, 0.63)  | 0.64<br>(0.42, 0.79)  | 0.35<br>(0.26, 2.73)   | 0.33<br>(0.24, 0.47)  | 0.10<br>(0.02, 0.32)  | 0.38<br>(0.31, 0.47)    | -0.02<br>(-0.07, 0.04) | -31.49<br>(-37.73, -26.68) | 45.96<br>(36.39, 60.58)      | 1.00<br>(1.00, 1.01) |
| InverseVariance    | 0.26<br>(0.01, 0.71)  | 0.58<br>(0.33, 0.74)  | 0.11<br>(0.09, 0.13)   | 0.12<br>(0.08, 0.16)  | 0.06<br>(0.01, 0.16)  | 0.23<br>(0.19, 0.29)    | 0.01<br>(-0.03, 0.04)  | -20.71<br>(-25.24, -17.44) | 26.11<br>(21.12, 33.76)      | 1.00<br>(1.00, 1.02) |
| JointAverage       | 0.68<br>(0.08, 0.94)  | 0.90<br>(0.83, 0.95)  | 0.08<br>(0.07, 0.10)   | 0.22<br>(0.18, 0.29)  | 0.10<br>(0.02, 0.28)  | 0.22<br>(0.18, 0.27)    | 0.00<br>(-0.03, 0.03)  | -19.78<br>(-23.98, -16.72) | 24.66<br>(20.07, 31.55)      | 1.00<br>(1.00, 1.00) |
| JointEnergy        | 0.64<br>(0.11, 0.92)  | 0.84<br>(0.72, 0.91)  | 0.07<br>(0.06, 0.09)   | 0.15<br>(0.12, 0.20)  | 0.09<br>(0.02, 0.23)  | 0.51<br>(0.42, 0.64)    | -0.03<br>(-0.11, 0.05) | -40.16<br>(-47.40, -34.59) | 67.11<br>(52.89, 90.12)      | 1.00<br>(1.00, 1.00) |
| JointEntropy       | 0.69<br>(0.20, 0.93)  | 0.83<br>(0.70, 0.90)  | 0.04<br>(0.03, 0.05)   | 0.09<br>(0.07, 0.11)  | 0.06<br>(0.02, 0.14)  | 0.16<br>(0.14, 0.21)    | 0.01<br>(-0.01, 0.03)  | -15.17<br>(-18.70, -12.63) | 17.89<br>(14.46, 23.01)      | 1.00<br>(1.00, 1.00) |
| MaximumProbability | 0.39<br>(0.03, 0.83)  | 0.73<br>(0.55, 0.85)  | 0.11<br>(0.09, 0.14)   | 0.17<br>(0.13, 0.23)  | 0.08<br>(0.02, 0.23)  | 0.62<br>(0.51, 0.78)    | -0.02<br>(-0.11, 0.08) | -46.23<br>(-54.20, -40.03) | 85.99<br>(66.74, 118.33)     | 1.00<br>(1.00, 1.01) |
| SumEntropy         | 0.63<br>(0.14, 0.91)  | 0.76<br>(0.59, 0.86)  | 0.05<br>(0.04, 0.06)   | 0.09<br>(0.07, 0.12)  | 0.07<br>(0.02, 0.15)  | 0.15<br>(0.13, 0.19)    | 0.01<br>(-0.01, 0.04)  | -14.09<br>(-17.31, -11.78) | 16.40<br>(13.36, 20.93)      | 1.00<br>(1.00, 1.00) |
| SumSquares         | 0.57<br>(0.09, 0.88)  | 0.72<br>(0.54, 0.84)  | 2.60<br>(0.89, 53.43)  | 0.87<br>(0.54, 8.46)  | 0.44<br>(0.13, 1.38)  | 0.78<br>(0.64, 1.01)    | 0.04<br>(-0.07, 0.16)  | -54.00<br>(-63.65, -47.08) | 117.41<br>(88.98, 175.08)    | 1.00<br>(1.00, 1.01) |

gldm

| Name                    | ICC inter<br>(95% CI) | ICC intra<br>(95% CI) | wLCV<br>(95% CI)     | blCV<br>(95% CI)     | bCV<br>(95% CI)      | RC<br>(95% CI)       | bias<br>(95% CI)       | -LoA (%)<br>(95% CI)       | +LoA (%)<br>(95% CI)    | R-hat<br>(range)     |
|-------------------------|-----------------------|-----------------------|----------------------|----------------------|----------------------|----------------------|------------------------|----------------------------|-------------------------|----------------------|
| DependenceEntropy       | 0.39<br>(0.01, 0.83)  | 0.74<br>(0.56, 0.85)  | 0.02<br>(0.02, 0.03) | 0.04<br>(0.03, 0.05) | 0.02<br>(0.00, 0.05) | 0.09<br>(0.07, 0.11) | -0.00<br>(-0.01, 0.01) | -8.39<br>(-10.32, -6.94)   | 9.16<br>(7.46, 11.50)   | 1.00<br>(1.00, 1.01) |
| DependenceNonUniformity | 0.49<br>(0.04, 0.93)  | 0.94<br>(0.89, 0.97)  | 0.04<br>(0.03, 0.05) | 0.15<br>(0.12, 0.19) | 0.04<br>(0.01, 0.14) | 0.51<br>(0.42, 0.63) | 0.01<br>(-0.07, 0.08)  | -39.71<br>(-46.82, -33.97) | 65.87<br>(51.45, 88.03) | 1.00<br>(1.00, 1.00) |

|                                      |                      |                      |                       |                       |                      |                      |                        |                            |                            |                      |
|--------------------------------------|----------------------|----------------------|-----------------------|-----------------------|----------------------|----------------------|------------------------|----------------------------|----------------------------|----------------------|
| DependenceNonUniformityNormalized    | 0.65<br>(0.06, 0.92) | 0.88<br>(0.80, 0.93) | 0.06<br>(0.05, 0.08)  | 0.16<br>(0.13, 0.21)  | 0.08<br>(0.01, 0.19) | 0.23<br>(0.19, 0.28) | 0.01<br>(-0.02, 0.04)  | -20.17<br>(-24.64, -16.92) | 25.27<br>(20.36, 32.70)    | 1.00<br>(1.00, 1.01) |
| DependenceVariance                   | 0.53<br>(0.06, 0.88) | 0.82<br>(0.68, 0.90) | 2.95<br>(0.95, 55.03) | 1.57<br>(0.80, 28.48) | 0.48<br>(0.12, 1.92) | 0.52<br>(0.43, 0.66) | 0.00<br>(-0.08, 0.08)  | -40.79<br>(-48.37, -34.97) | 68.89<br>(53.78, 93.68)    | 1.00<br>(1.00, 1.00) |
| GrayLevelNonUniformity               | 0.81<br>(0.13, 0.97) | 0.97<br>(0.95, 0.98) | 0.04<br>(0.03, 0.05)  | 0.22<br>(0.18, 0.29)  | 0.08<br>(0.01, 0.23) | 0.49<br>(0.40, 0.61) | -0.02<br>(-0.09, 0.05) | -38.64<br>(-45.49, -33.29) | 62.97<br>(49.90, 83.45)    | 1.00<br>(1.00, 1.01) |
| GrayLevelVariance                    | 0.45<br>(0.02, 0.84) | 0.68<br>(0.48, 0.81) | 1.69<br>(0.64, 40.03) | 0.60<br>(0.41, 1.84)  | 0.32<br>(0.05, 0.89) | 0.89<br>(0.74, 1.12) | 0.04<br>(-0.09, 0.17)  | -58.89<br>(-67.44, -52.25) | 143.24<br>(109.41, 207.15) | 1.00<br>(1.00, 1.02) |
| HighGrayLevelEmphasis                | 0.68<br>(0.11, 0.93) | 0.87<br>(0.77, 0.93) | 0.08<br>(0.06, 0.10)  | 0.19<br>(0.15, 0.25)  | 0.10<br>(0.03, 0.25) | 0.50<br>(0.41, 0.62) | 0.01<br>(-0.06, 0.09)  | -39.47<br>(-46.38, -33.81) | 65.19<br>(51.09, 86.50)    | 1.00<br>(1.00, 1.00) |
| LargeDependenceEmphasis              | 0.70<br>(0.09, 0.94) | 0.91<br>(0.83, 0.95) | 0.07<br>(0.05, 0.08)  | 0.19<br>(0.15, 0.25)  | 0.10<br>(0.02, 0.24) | 0.34<br>(0.28, 0.43) | -0.01<br>(-0.06, 0.05) | -28.83<br>(-34.99, -24.52) | 40.50<br>(32.49, 53.83)    | 1.00<br>(1.00, 1.01) |
| LargeDependenceHighGrayLevelEmphasis | 0.63<br>(0.14, 0.91) | 0.79<br>(0.64, 0.88) | 0.03<br>(0.03, 0.04)  | 0.07<br>(0.05, 0.09)  | 0.04<br>(0.01, 0.10) | 0.39<br>(0.32, 0.49) | 0.01<br>(-0.05, 0.07)  | -32.59<br>(-38.72, -27.56) | 48.34<br>(38.04, 63.18)    | 1.00<br>(1.00, 1.00) |
| LargeDependenceLowGrayLevelEmphasis  | 0.62<br>(0.05, 0.93) | 0.92<br>(0.86, 0.96) | 2.00<br>(0.69, 38.58) | 3.03<br>(1.24, 69.25) | 0.63<br>(0.10, 4.72) | 0.70<br>(0.57, 0.87) | 0.04<br>(-0.07, 0.14)  | -50.16<br>(-57.95, -43.72) | 100.64<br>(77.69, 137.80)  | 1.00<br>(1.00, 1.02) |
| LowGrayLevelEmphasis                 | 0.62<br>(0.08, 0.93) | 0.90<br>(0.82, 0.95) | 0.11<br>(0.09, 0.14)  | 0.29<br>(0.23, 0.39)  | 0.12<br>(0.03, 0.34) | 0.40<br>(0.33, 0.50) | 0.04<br>(-0.01, 0.10)  | -33.00<br>(-39.47, -28.23) | 49.26<br>(39.34, 65.22)    | 1.00<br>(1.00, 1.01) |
| SmallDependenceEmphasis              | 0.75<br>(0.23, 0.95) | 0.91<br>(0.85, 0.95) | 0.10<br>(0.08, 0.12)  | 0.28<br>(0.22, 0.37)  | 0.15<br>(0.05, 0.35) | 0.23<br>(0.19, 0.29) | 0.00<br>(-0.03, 0.04)  | -20.50<br>(-24.82, -17.28) | 25.79<br>(20.88, 33.02)    | 1.00<br>(1.00, 1.00) |
| SmallDependenceHighGrayLevelEmphasis | 0.67<br>(0.18, 0.92) | 0.84<br>(0.73, 0.91) | 0.22<br>(0.17, 1.15)  | 0.35<br>(0.27, 0.50)  | 0.21<br>(0.07, 0.51) | 0.74<br>(0.61, 0.93) | 0.01<br>(-0.10, 0.12)  | -52.48<br>(-60.61, -45.72) | 110.44<br>(84.24, 153.85)  | 1.00<br>(1.00, 1.00) |
| SmallDependenceLowGrayLevelEmphasis  | 0.42<br>(0.01, 0.81) | 0.60<br>(0.38, 0.77) | 0.06<br>(0.05, 0.07)  | 0.07<br>(0.05, 0.09)  | 0.05<br>(0.01, 0.11) | 0.40<br>(0.33, 0.50) | 0.04<br>(-0.02, 0.09)  | -32.98<br>(-39.30, -27.93) | 49.21<br>(38.76, 64.74)    | 1.00<br>(1.00, 1.02) |

glrlm

| Name                             | ICC inter<br>(95% CI) | ICC intra<br>(95% CI) | wLCV<br>(95% CI)      | bLCV<br>(95% CI)     | bCV<br>(95% CI)      | RC<br>(95% CI)       | bias<br>(95% CI)       | -LoA (%)<br>(95% CI)       | +LoA (%)<br>(95% CI)       | R-hat<br>(range)     |
|----------------------------------|-----------------------|-----------------------|-----------------------|----------------------|----------------------|----------------------|------------------------|----------------------------|----------------------------|----------------------|
| GrayLevelNonUniformity           | 0.78<br>(0.11, 0.97)  | 0.97<br>(0.94, 0.98)  | 0.04<br>(0.03, 0.05)  | 0.22<br>(0.18, 0.28) | 0.07<br>(0.01, 0.22) | 0.46<br>(0.38, 0.58) | -0.01<br>(-0.08, 0.05) | -37.06<br>(-43.93, -31.81) | 58.87<br>(46.66, 78.34)    | 1.00<br>(1.00, 1.02) |
| GrayLevelNonUniformityNormalized | 0.66<br>(0.15, 0.92)  | 0.85<br>(0.74, 0.92)  | 0.06<br>(0.05, 0.07)  | 0.14<br>(0.11, 0.18) | 0.08<br>(0.02, 0.19) | 0.26<br>(0.21, 0.32) | -0.01<br>(-0.05, 0.02) | -22.73<br>(-27.50, -19.22) | 29.42<br>(23.79, 37.93)    | 1.00<br>(1.00, 1.00) |
| GrayLevelVariance                | 0.44<br>(0.06, 0.82)  | 0.63<br>(0.42, 0.78)  | 1.01<br>(0.49, 22.36) | 0.50<br>(0.35, 1.15) | 0.30<br>(0.08, 0.79) | 0.92<br>(0.76, 1.15) | 0.04<br>(-0.10, 0.18)  | -60.23<br>(-68.27, -53.15) | 151.45<br>(113.47, 215.13) | 1.00<br>(1.00, 1.00) |
| HighGrayLevelRunEmphasis         | 0.64<br>(0.12, 0.92)  | 0.85<br>(0.74, 0.92)  | 0.08<br>(0.06, 0.09)  | 0.17<br>(0.13, 0.22) | 0.10<br>(0.03, 0.24) | 0.51<br>(0.42, 0.64) | 0.01<br>(-0.07, 0.08)  | -40.22<br>(-47.17, -34.26) | 67.29<br>(52.11, 89.28)    | 1.00<br>(1.00, 1.00) |
| LongRunEmphasis                  | 0.76<br>(0.14, 0.95)  | 0.92<br>(0.86, 0.96)  | 0.12<br>(0.10, 0.15)  | 0.36<br>(0.28, 0.48) | 0.18<br>(0.04, 0.43) | 0.18<br>(0.15, 0.22) | -0.00<br>(-0.03, 0.02) | -16.26<br>(-19.91, -13.58) | 19.42<br>(15.71, 24.86)    | 1.00<br>(1.00, 1.01) |
| LongRunHighGrayLevelEmphasis     | 0.59<br>(0.03, 0.91)  | 0.85<br>(0.73, 0.91)  | 0.05<br>(0.04, 0.06)  | 0.11<br>(0.09, 0.14) | 0.06<br>(0.01, 0.14) | 0.39<br>(0.33, 0.50) | 0.02<br>(-0.05, 0.08)  | -32.59<br>(-39.12, -27.79) | 48.35<br>(38.49, 64.25)    | 1.00<br>(1.00, 1.02) |
| LongRunLowGrayLevelEmphasis      | 0.67<br>(0.10, 0.94)  | 0.92<br>(0.86, 0.96)  | 1.79<br>(0.62, 31.39) | 0.91<br>(0.63, 4.14) | 0.33<br>(0.07, 1.08) | 0.54<br>(0.45, 0.67) | 0.04<br>(-0.04, 0.12)  | -41.56<br>(-49.06, -35.98) | 71.12<br>(56.20, 96.30)    | 1.00<br>(1.00, 1.00) |
| LowGrayLevelRunEmphasis          | 0.61<br>(0.06, 0.93)  | 0.90<br>(0.82, 0.94)  | 0.10<br>(0.08, 0.13)  | 0.27<br>(0.21, 0.36) | 0.11<br>(0.02, 0.33) | 0.38<br>(0.32, 0.48) | 0.04<br>(-0.01, 0.10)  | -31.85<br>(-38.25, -27.23) | 46.73<br>(37.43, 61.95)    | 1.00<br>(1.00, 1.01) |
| RunEntropy                       | 0.43<br>(0.05, 0.84)  | 0.69<br>(0.48, 0.82)  | 0.03<br>(0.03, 0.04)  | 0.05<br>(0.04, 0.07) | 0.03<br>(0.01, 0.07) | 0.11<br>(0.09, 0.14) | 0.00<br>(-0.01, 0.02)  | -10.54<br>(-13.16, -8.80)  | 11.78<br>(9.65, 15.16)     | 1.00<br>(1.00, 1.01) |
| RunLengthNonUniformity           | 0.54<br>(0.03, 0.94)  | 0.95<br>(0.91, 0.97)  | 0.03<br>(0.03, 0.04)  | 0.13<br>(0.11, 0.17) | 0.03<br>(0.01, 0.12) | 0.48<br>(0.40, 0.60) | 0.00<br>(-0.07, 0.08)  | -38.18<br>(-45.21, -32.79) | 61.75<br>(48.79, 82.50)    | 1.00<br>(1.00, 1.01) |
| RunLengthNonUniformityNormalized | 0.73<br>(0.18, 0.94)  | 0.92<br>(0.85, 0.95)  | 0.12<br>(0.10, 0.16)  | 0.35<br>(0.27, 0.47) | 0.17<br>(0.05, 0.42) | 0.10<br>(0.08, 0.13) | 0.00<br>(-0.01, 0.02)  | -9.63<br>(-11.85, -7.99)   | 10.66<br>(8.68, 13.45)     | 1.00<br>(1.00, 1.01) |
| RunPercentage                    | 0.74<br>(0.16, 0.95)  | 0.92<br>(0.86, 0.96)  | 0.13<br>(0.11, 0.17)  | 0.38<br>(0.30, 0.52) | 0.18<br>(0.05, 0.47) | 0.06<br>(0.05, 0.08) | 0.00<br>(-0.01, 0.01)  | -5.81<br>(-7.33, -4.83)    | 6.16<br>(5.07, 7.91)       | 1.00<br>(1.00, 1.01) |
| RunVariance                      | 0.76<br>(0.23, 0.95)  | 0.91<br>(0.84, 0.95)  | 0.38<br>(0.22, 5.55)  | 0.46<br>(0.35, 0.69) | 0.24<br>(0.08, 0.59) | 0.45<br>(0.37, 0.55) | 0.02<br>(-0.05, 0.08)  | -35.92<br>(-42.50, -30.59) | 56.06<br>(44.06, 73.93)    | 1.00<br>(1.00, 1.00) |
| ShortRunEmphasis                 | 0.72<br>(0.06, 0.95)  | 0.92<br>(0.86, 0.96)  | 0.13<br>(0.11, 0.17)  | 0.38<br>(0.29, 0.50) | 0.17<br>(0.02, 0.46) | 0.05<br>(0.04, 0.06) | 0.00<br>(-0.01, 0.01)  | -4.47<br>(-5.60, -3.74)    | 4.68<br>(3.88, 5.93)       | 1.00<br>(1.00, 1.01) |
| ShortRunHighGrayLevelEmphasis    | 0.65<br>(0.12, 0.93)  | 0.85<br>(0.74, 0.92)  | 0.09<br>(0.07, 0.11)  | 0.19<br>(0.15, 0.25) | 0.11<br>(0.03, 0.29) | 0.55<br>(0.45, 0.69) | 0.01<br>(-0.07, 0.09)  | -42.32<br>(-49.76, -36.21) | 73.38<br>(56.76, 99.04)    | 1.00<br>(1.00, 1.00) |
| ShortRunLowGrayLevelEmphasis     | 0.59<br>(0.05, 0.91)  | 0.87<br>(0.78, 0.93)  | 0.08<br>(0.07, 0.10)  | 0.20<br>(0.16, 0.26) | 0.09<br>(0.02, 0.26) | 0.37<br>(0.31, 0.46) | 0.05<br>(-0.00, 0.10)  | -30.98<br>(-36.81, -26.37) | 44.88<br>(35.81, 58.26)    | 1.00<br>(1.00, 1.01) |

glszm

| Name                             | ICC inter<br>(95% CI) | ICC intra<br>(95% CI) | wLCV<br>(95% CI)     | bLCV<br>(95% CI)     | bCV<br>(95% CI)      | RC<br>(95% CI)       | bias<br>(95% CI)       | -LoA (%)<br>(95% CI)       | +LoA (%)<br>(95% CI)       | R-hat<br>(range)     |
|----------------------------------|-----------------------|-----------------------|----------------------|----------------------|----------------------|----------------------|------------------------|----------------------------|----------------------------|----------------------|
| GrayLevelNonUniformity           | 0.65<br>(0.03, 0.96)  | 0.96<br>(0.92, 0.98)  | 0.05<br>(0.04, 0.06) | 0.21<br>(0.17, 0.27) | 0.06<br>(0.01, 0.21) | 0.44<br>(0.36, 0.55) | -0.01<br>(-0.08, 0.05) | -35.58<br>(-42.52, -30.41) | 55.22<br>(43.70, 73.96)    | 1.00<br>(1.00, 1.02) |
| GrayLevelNonUniformityNormalized | 0.58<br>(0.08, 0.89)  | 0.77<br>(0.60, 0.87)  | 0.06<br>(0.05, 0.08) | 0.11<br>(0.08, 0.14) | 0.07<br>(0.02, 0.16) | 0.28<br>(0.23, 0.36) | -0.01<br>(-0.06, 0.03) | -24.70<br>(-29.93, -20.86) | 32.79<br>(26.36, 42.71)    | 1.00<br>(1.00, 1.00) |
| GrayLevelVariance                | 0.36<br>(0.04, 0.77)  | 0.52<br>(0.27, 0.71)  | 0.44<br>(0.33, 2.97) | 0.34<br>(0.22, 0.55) | 0.22<br>(0.06, 0.59) | 1.02<br>(0.83, 1.27) | 0.03<br>(-0.12, 0.18)  | -63.82<br>(-71.91, -56.55) | 176.36<br>(130.14, 256.01) | 1.00<br>(1.00, 1.00) |
| HighGrayLevelZoneEmphasis        | 0.58<br>(0.12, 0.89)  | 0.77<br>(0.61, 0.87)  | 0.08<br>(0.06, 0.10) | 0.14<br>(0.10, 0.18) | 0.09<br>(0.03, 0.21) | 0.58<br>(0.48, 0.72) | 0.00<br>(-0.08, 0.09)  | -43.80<br>(-51.32, -37.84) | 77.93<br>(60.87, 105.41)   | 1.00<br>(1.00, 1.00) |
| LargeAreaEmphasis                | 0.76<br>(0.18, 0.96)  | 0.94<br>(0.89, 0.97)  | 0.11<br>(0.09, 0.14) | 0.37<br>(0.29, 0.49) | 0.16<br>(0.04, 0.42) | 0.56<br>(0.46, 0.70) | -0.01<br>(-0.09, 0.07) | -42.92<br>(-50.19, -36.75) | 75.20<br>(58.11, 100.78)   | 1.00<br>(1.00, 1.01) |

|                                 |                      |                      |                       |                       |                      |                      |                        |                            |                            |                      |
|---------------------------------|----------------------|----------------------|-----------------------|-----------------------|----------------------|----------------------|------------------------|----------------------------|----------------------------|----------------------|
| LargeAreaHighGrayLevelEmphasis  | 0.66<br>(0.08, 0.93) | 0.88<br>(0.79, 0.93) | 0.04<br>(0.03, 0.05)  | 0.10<br>(0.08, 0.13)  | 0.05<br>(0.01, 0.13) | 0.46<br>(0.38, 0.57) | 0.01<br>(-0.06, 0.08)  | -36.90<br>(-43.48, -31.46) | 58.48<br>(45.91, 76.92)    | 1.00<br>(1.00, 1.01) |
| LargeAreaLowGrayLevelEmphasis   | 0.69<br>(0.10, 0.94) | 0.94<br>(0.89, 0.97) | 2.34<br>(0.81, 49.70) | 2.89<br>(1.20, 60.64) | 0.61<br>(0.13, 4.06) | 0.88<br>(0.72, 1.10) | 0.03<br>(-0.10, 0.15)  | -58.47<br>(-66.87, -51.56) | 140.79<br>(106.45, 201.80) | 1.00<br>(1.00, 1.01) |
| LowGrayLevelZoneEmphasis        | 0.57<br>(0.06, 0.91) | 0.86<br>(0.75, 0.92) | 0.09<br>(0.08, 0.12)  | 0.22<br>(0.17, 0.29)  | 0.10<br>(0.02, 0.28) | 0.39<br>(0.32, 0.48) | 0.04<br>(-0.02, 0.10)  | -32.07<br>(-38.31, -27.35) | 47.21<br>(37.65, 62.10)    | 1.00<br>(1.00, 1.00) |
| SizeZoneNonUniformity           | 0.33<br>(0.03, 0.88) | 0.89<br>(0.81, 0.94) | 0.05<br>(0.04, 0.07)  | 0.15<br>(0.12, 0.19)  | 0.04<br>(0.01, 0.14) | 0.61<br>(0.50, 0.77) | -0.01<br>(-0.10, 0.09) | -45.87<br>(-53.51, -39.37) | 84.75<br>(64.94, 115.08)   | 1.00<br>(1.00, 1.02) |
| SizeZoneNonUniformityNormalized | 0.60<br>(0.13, 0.90) | 0.81<br>(0.68, 0.89) | 0.11<br>(0.09, 0.14)  | 0.21<br>(0.16, 0.28)  | 0.12<br>(0.04, 0.29) | 0.27<br>(0.22, 0.33) | -0.01<br>(-0.05, 0.03) | -23.44<br>(-28.30, -19.67) | 30.61<br>(24.49, 39.47)    | 1.00<br>(1.00, 1.00) |
| SmallAreaEmphasis               | 0.53<br>(0.06, 0.86) | 0.76<br>(0.60, 0.87) | 0.15<br>(0.12, 0.19)  | 0.24<br>(0.19, 0.33)  | 0.14<br>(0.04, 0.33) | 0.17<br>(0.14, 0.21) | -0.01<br>(-0.03, 0.02) | -15.24<br>(-18.74, -12.64) | 17.98<br>(14.47, 23.07)    | 1.00<br>(1.00, 1.00) |
| SmallAreaHighGrayLevelEmphasis  | 0.55<br>(0.10, 0.88) | 0.73<br>(0.55, 0.84) | 0.12<br>(0.10, 0.14)  | 0.18<br>(0.13, 0.24)  | 0.12<br>(0.04, 0.29) | 0.74<br>(0.61, 0.92) | -0.00<br>(-0.11, 0.11) | -52.33<br>(-60.33, -45.56) | 109.75<br>(83.68, 152.07)  | 1.00<br>(1.00, 1.00) |
| SmallAreaLowGrayLevelEmphasis   | 0.31<br>(0.01, 0.77) | 0.58<br>(0.32, 0.75) | 0.08<br>(0.07, 0.11)  | 0.10<br>(0.07, 0.13)  | 0.06<br>(0.01, 0.15) | 0.48<br>(0.39, 0.60) | 0.01<br>(-0.06, 0.08)  | -38.08<br>(-45.27, -32.49) | 61.50<br>(48.13, 82.72)    | 1.00<br>(1.00, 1.01) |
| ZoneEntropy                     | 0.38<br>(0.03, 0.81) | 0.73<br>(0.54, 0.84) | 0.02<br>(0.02, 0.03)  | 0.04<br>(0.03, 0.05)  | 0.02<br>(0.00, 0.05) | 0.10<br>(0.08, 0.13) | 0.00<br>(-0.01, 0.02)  | -9.69<br>(-11.83, -8.05)   | 10.73<br>(8.76, 13.42)     | 1.00<br>(1.00, 1.00) |
| ZonePercentage                  | 0.77<br>(0.16, 0.95) | 0.93<br>(0.87, 0.96) | 0.11<br>(0.09, 0.14)  | 0.34<br>(0.27, 0.46)  | 0.17<br>(0.04, 0.42) | 0.20<br>(0.16, 0.25) | 0.01<br>(-0.02, 0.04)  | -18.17<br>(-22.21, -15.13) | 22.20<br>(17.82, 28.55)    | 1.00<br>(1.00, 1.01) |
| ZoneVariance                    | 0.71<br>(0.10, 0.94) | 0.93<br>(0.87, 0.96) | 0.73<br>(0.36, 13.43) | 0.83<br>(0.59, 3.61)  | 0.31<br>(0.07, 0.92) | 0.81<br>(0.66, 1.02) | 0.02<br>(-0.10, 0.14)  | -55.51<br>(-63.79, -48.34) | 124.79<br>(93.58, 176.17)  | 1.00<br>(1.00, 1.01) |

ngtdm

| Name       | ICC inter<br>(95% CI) | ICC intra<br>(95% CI) | wICV<br>(95% CI)        | bICV<br>(95% CI)      | bCV<br>(95% CI)       | RC<br>(95% CI)       | bias<br>(95% CI)       | -LoA (%)<br>(95% CI)       | +LoA (%)<br>(95% CI)        | R-hat<br>(range)     |
|------------|-----------------------|-----------------------|-------------------------|-----------------------|-----------------------|----------------------|------------------------|----------------------------|-----------------------------|----------------------|
| Busyness   | 0.57<br>(0.08, 0.91)  | 0.86<br>(0.75, 0.92)  | 1.63<br>(0.63, 31.94)   | 1.25<br>(0.74, 18.58) | 0.43<br>(0.10, 1.74)  | 0.93<br>(0.76, 1.15) | 0.02<br>(-0.12, 0.16)  | -60.40<br>(-68.33, -53.35) | 152.53<br>(114.37, 215.79)  | 1.00<br>(1.00, 1.00) |
| Coarseness | 0.56<br>(0.06, 0.94)  | 0.94<br>(0.90, 0.97)  | 0.05<br>(0.04, 0.06)    | 0.19<br>(0.15, 0.25)  | 0.05<br>(0.01, 0.19)  | 0.56<br>(0.46, 0.70) | 0.01<br>(-0.07, 0.10)  | -42.97<br>(-50.14, -37.08) | 75.36<br>(58.93, 100.56)    | 1.00<br>(1.00, 1.01) |
| Complexity | 0.34<br>(0.04, 0.78)  | 0.40<br>(0.10, 0.63)  | 0.17<br>(0.14, 0.21)    | 0.13<br>(0.07, 0.20)  | 0.12<br>(0.03, 0.31)  | 1.79<br>(1.46, 2.22) | -0.00<br>(-0.26, 0.26) | -83.24<br>(-89.19, -76.85) | 496.51<br>(331.88, 825.01)  | 1.00<br>(1.00, 1.00) |
| Contrast   | 0.53<br>(0.06, 0.88)  | 0.83<br>(0.70, 0.90)  | 0.09<br>(0.07, 0.11)    | 0.18<br>(0.14, 0.24)  | 0.09<br>(0.02, 0.22)  | 0.66<br>(0.55, 0.83) | 0.07<br>(-0.03, 0.17)  | -48.48<br>(-56.42, -42.32) | 94.10<br>(73.37, 129.44)    | 1.00<br>(1.00, 1.00) |
| Strength   | 0.29<br>(0.02, 0.71)  | 0.30<br>(0.05, 0.56)  | 10.93<br>(3.06, 199.52) | 4.33<br>(0.97, 95.72) | 2.45<br>(0.43, 52.27) | 1.97<br>(1.62, 2.43) | -0.01<br>(-0.30, 0.28) | -86.04<br>(-91.16, -80.28) | 616.59<br>(407.18, 1031.44) | 1.00<br>(1.00, 1.01) |

shape

| Name                    | ICC inter<br>(95% CI) | ICC intra<br>(95% CI) | wICV<br>(95% CI)      | bICV<br>(95% CI)     | bCV<br>(95% CI)      | RC<br>(95% CI)       | bias<br>(95% CI)       | -LoA (%)<br>(95% CI)       | +LoA (%)<br>(95% CI)    | R-hat<br>(range)     |
|-------------------------|-----------------------|-----------------------|-----------------------|----------------------|----------------------|----------------------|------------------------|----------------------------|-------------------------|----------------------|
| Elongation              | 0.39<br>(0.02, 0.85)  | 0.84<br>(0.73, 0.91)  | 0.69<br>(0.40, 12.37) | 0.69<br>(0.50, 1.40) | 0.22<br>(0.04, 0.71) | 0.29<br>(0.24, 0.36) | 0.02<br>(-0.02, 0.06)  | -25.09<br>(-30.27, -21.15) | 33.49<br>(26.83, 43.42) | 1.00<br>(1.00, 1.00) |
| Flatness                | 0.31<br>(0.02, 0.84)  | 0.84<br>(0.73, 0.91)  | 0.19<br>(0.15, 0.24)  | 0.36<br>(0.29, 0.49) | 0.10<br>(0.02, 0.36) | 0.34<br>(0.28, 0.42) | -0.01<br>(-0.06, 0.04) | -28.87<br>(-34.57, -24.39) | 40.59<br>(32.26, 52.84) | 1.00<br>(1.00, 1.02) |
| LeastAxisLength         | 0.48<br>(0.02, 0.92)  | 0.91<br>(0.84, 0.95)  | 0.04<br>(0.04, 0.05)  | 0.13<br>(0.11, 0.17) | 0.04<br>(0.01, 0.14) | 0.31<br>(0.26, 0.39) | -0.02<br>(-0.07, 0.02) | -26.44<br>(-32.00, -22.52) | 35.94<br>(29.06, 47.06) | 1.01<br>(1.00, 1.02) |
| MajorAxisLength         | 0.65<br>(0.04, 0.95)  | 0.96<br>(0.92, 0.98)  | 0.02<br>(0.02, 0.03)  | 0.10<br>(0.09, 0.13) | 0.03<br>(0.00, 0.10) | 0.21<br>(0.18, 0.27) | -0.01<br>(-0.05, 0.02) | -19.29<br>(-23.44, -16.32) | 23.90<br>(19.51, 30.61) | 1.00<br>(1.00, 1.02) |
| Maximum2DDiameterColumn | 0.50<br>(0.02, 0.91)  | 0.93<br>(0.88, 0.96)  | 0.03<br>(0.02, 0.04)  | 0.11<br>(0.09, 0.14) | 0.03<br>(0.00, 0.10) | 0.28<br>(0.23, 0.35) | -0.02<br>(-0.06, 0.03) | -24.64<br>(-29.67, -20.66) | 32.69<br>(26.05, 42.19) | 1.00<br>(1.00, 1.01) |
| Maximum2DDiameterRow    | 0.46<br>(0.03, 0.92)  | 0.94<br>(0.89, 0.97)  | 0.03<br>(0.02, 0.03)  | 0.11<br>(0.09, 0.14) | 0.03<br>(0.01, 0.09) | 0.26<br>(0.22, 0.33) | 0.02<br>(-0.02, 0.05)  | -23.12<br>(-27.80, -19.57) | 30.07<br>(24.32, 38.51) | 1.00<br>(1.00, 1.01) |
| Maximum2DDiameterSlice  | 0.60<br>(0.05, 0.94)  | 0.95<br>(0.90, 0.97)  | 0.02<br>(0.02, 0.03)  | 0.09<br>(0.08, 0.12) | 0.03<br>(0.01, 0.09) | 0.21<br>(0.18, 0.27) | -0.01<br>(-0.04, 0.02) | -19.31<br>(-23.36, -16.29) | 23.94<br>(19.47, 30.48) | 1.00<br>(1.00, 1.01) |
| Maximum3DDiameter       | 0.68<br>(0.06, 0.96)  | 0.96<br>(0.93, 0.98)  | 0.02<br>(0.02, 0.03)  | 0.10<br>(0.08, 0.13) | 0.03<br>(0.01, 0.10) | 0.21<br>(0.17, 0.26) | -0.01<br>(-0.04, 0.02) | -18.79<br>(-22.80, -15.86) | 23.13<br>(18.85, 29.54) | 1.00<br>(1.00, 1.01) |
| MeshVolume              | 0.70<br>(0.09, 0.96)  | 0.96<br>(0.93, 0.98)  | 0.02<br>(0.02, 0.03)  | 0.10<br>(0.08, 0.13) | 0.03<br>(0.01, 0.10) | 0.50<br>(0.41, 0.63) | -0.00<br>(-0.08, 0.07) | -39.55<br>(-46.74, -33.89) | 65.42<br>(51.27, 87.77) | 1.00<br>(1.00, 1.01) |
| MinorAxisLength         | 0.56<br>(0.02, 0.93)  | 0.94<br>(0.90, 0.97)  | 0.03<br>(0.02, 0.03)  | 0.10<br>(0.08, 0.13) | 0.03<br>(0.00, 0.09) | 0.22<br>(0.18, 0.27) | 0.01<br>(-0.02, 0.04)  | -19.74<br>(-23.96, -16.65) | 24.59<br>(19.97, 31.50) | 1.00<br>(1.00, 1.02) |
| Sphericity              | 0.21<br>(0.01, 0.79)  | 0.86<br>(0.76, 0.92)  | 0.15<br>(0.12, 0.19)  | 0.31<br>(0.25, 0.41) | 0.07<br>(0.01, 0.24) | 0.12<br>(0.10, 0.15) | 0.00<br>(-0.02, 0.02)  | -11.33<br>(-13.95, -9.45)  | 12.77<br>(10.44, 16.21) | 1.00<br>(1.00, 1.01) |
| SurfaceArea             | 0.68<br>(0.08, 0.96)  | 0.96<br>(0.93, 0.98)  | 0.02<br>(0.01, 0.02)  | 0.08<br>(0.07, 0.11) | 0.02<br>(0.00, 0.08) | 0.35<br>(0.29, 0.44) | -0.00<br>(-0.06, 0.05) | -29.63<br>(-35.62, -25.22) | 42.11<br>(33.72, 55.32) | 1.00<br>(1.00, 1.01) |
| SurfaceVolumeRatio      | 0.55<br>(0.05, 0.93)  | 0.93<br>(0.87, 0.96)  | 0.09<br>(0.07, 0.11)  | 0.28<br>(0.22, 0.37) | 0.09<br>(0.02, 0.29) | 0.21<br>(0.17, 0.26) | -0.00<br>(-0.03, 0.03) | -18.98<br>(-22.95, -15.95) | 23.43<br>(18.98, 29.79) | 1.00<br>(1.00, 1.01) |
| VoxelVolume             | 0.68<br>(0.06, 0.96)  | 0.96<br>(0.93, 0.98)  | 0.02<br>(0.02, 0.03)  | 0.10<br>(0.08, 0.12) | 0.03<br>(0.01, 0.10) | 0.49<br>(0.40, 0.61) | -0.00<br>(-0.08, 0.07) | -39.03<br>(-45.86, -33.22) | 64.01<br>(49.75, 84.69) | 1.00<br>(1.00, 1.01) |
