# Supplementary material for: Inter- and Intra-Patient Repeatability of Radiomic Features from Multiparametric Whole-Body MRI in Patients with Metastatic Prostate Cancer
Source: MDPI journal article supplement (doi:10.3390/cancers16091647), 2024-04-25
Supplement: s1 [file s1]

ADC

- firstorder
- gldm
- glszm
- gldm
- glrlm
- ngtdm
- glcm
- shape

rFF%

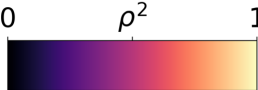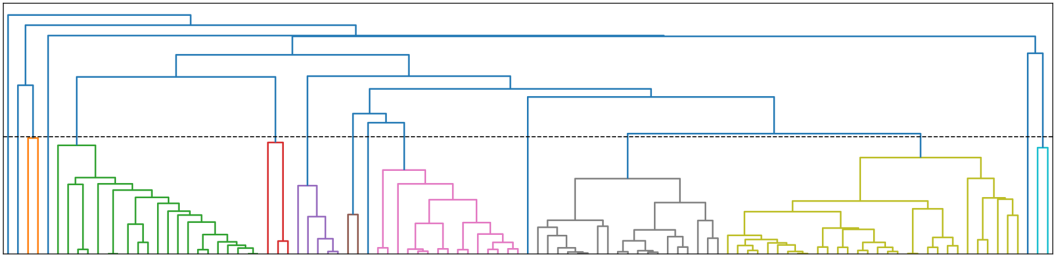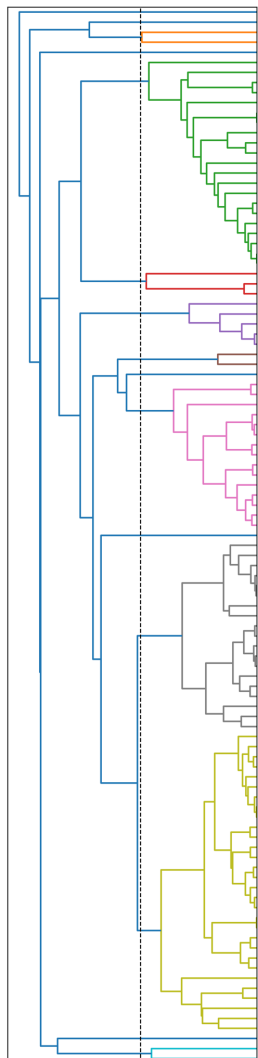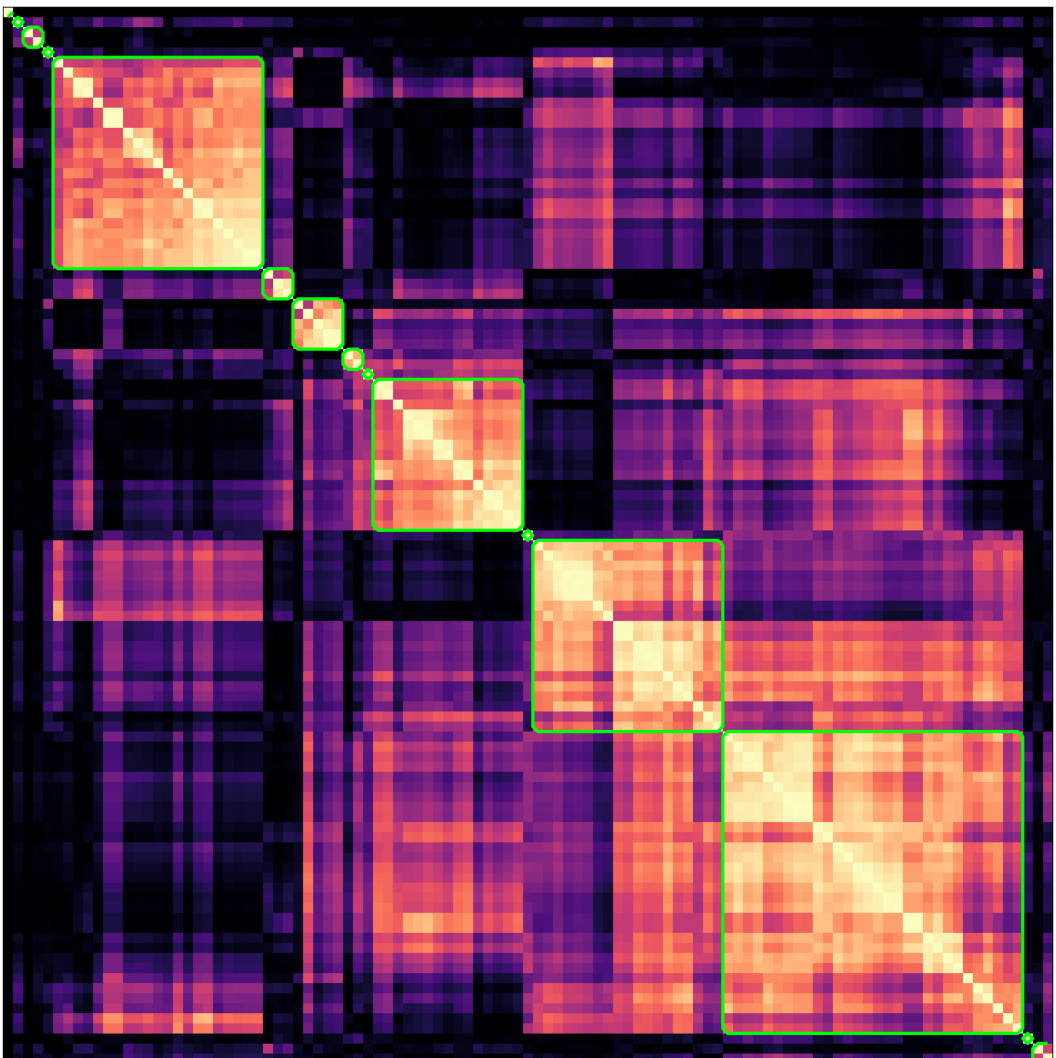

- Strength
- Sphericity
- Elongation
- Flatness
- Minimum
- LargeAreaHighGrayLevelEmphasis
- LeastAxisLength
- GrayLevelNonUniformity
- GrayLevelNonUniformity
- MaximumZDDiameterColumn
- Energy
- TotalEnergy
- MaximumZDDiameterSlice
- MajorAxisLength
- Maximum3DDiameter
- MaximumZDDiameterRow
- SurfaceVolumeRatio
- ZoneEntropy
- MinorAxisLength
- RunLengthNonUniformity
- DependenceNonUniformity
- GrayLevelNonUniformity
- Coarseness
- SurfaceArea
- MeshVolume
- VoxelVolume
- Kurtosis
- Idm
- 10Percentile
- 90Percentile
- Median
- Mean
- RootMeanSquared
- Inc1
- Inc2
- Busyness
- SizeZoneNonUniformityNormalized
- SmallAreaEmphasis
- Contrast
- RunPercentage
- RunLengthNonUniformityNormalized
- ShortRunEmphasis
- LongRunEmphasis
- RunVariance
- ZonePercentage
- SmallDependenceEmphasis
- DependenceVariance
- LargeAreaEmphasis
- ZoneVariance
- DependenceNonUniformityNormalized
- LargeDependenceEmphasis
- InverseVariance
- LongRunHighGrayLevelEmphasis
- SmallAreaLowGrayLevelEmphasis
- LowGrayLevelZoneEmphasis
- ShortRunLowGrayLevelEmphasis
- LowGrayLevelRunEmphasis
- LowGrayLevelEmphasis
- LargeDependenceHighGrayLevelEmphasis
- SmallDependenceLowGrayLevelEmphasis
- Autocorrelation
- JointAverage
- ShortRunHighGrayLevelEmphasis
- HighGrayLevelRunEmphasis
- HighGrayLevelEmphasis
- SmallDependenceHighGrayLevelEmphasis
- HighGrayLevelZoneEmphasis
- SmallAreaHighGrayLevelEmphasis
- LongRunLowGrayLevelEmphasis
- LargeAreaLowGrayLevelEmphasis
- LargeDependenceLowGrayLevelEmphasis
- GrayLevelNonUniformityNormalized
- MeanAbsoluteDeviation
- ClusterTendency
- SumSquares
- GrayLevelVariance
- ClusterProminence
- GrayLevelVariance
- Variance
- GrayLevelVariance
- JointEnergy
- MaximumProbability
- JointEntropy
- SumEntropy
- Entropy
- GrayLevelNonUniformityNormalized
- Uniformity
- InterquartileRange
- RobustMeanAbsoluteDeviation
- Idm
- Id
- Contrast
- DifferenceAverage
- DifferenceEntropy
- DifferenceVariance
- Maximum
- Range
- Complexity
- SizeZoneNonUniformity
- DependenceEntropy
- Correlation
- Skewness
- ClusterShade

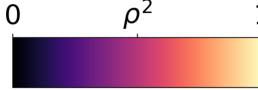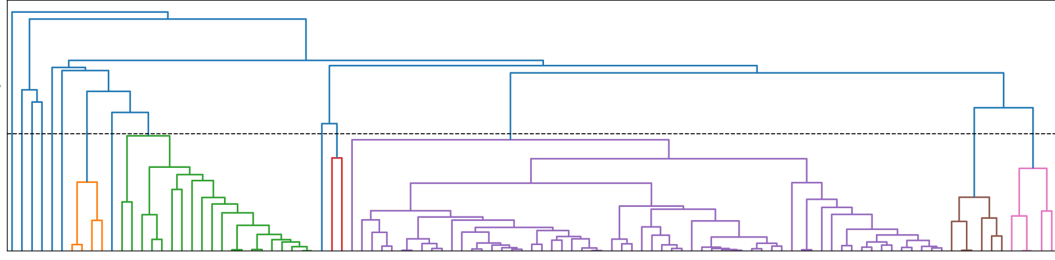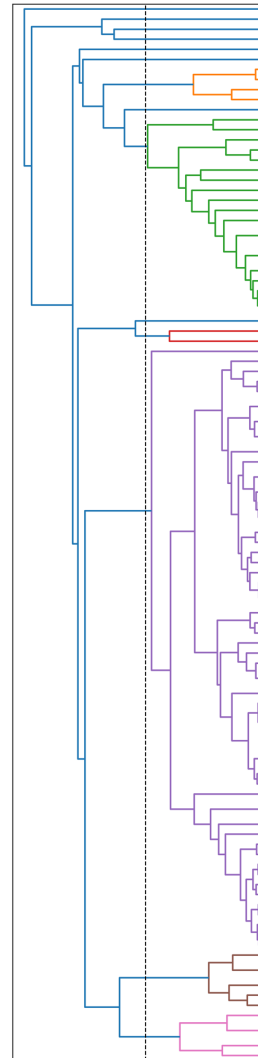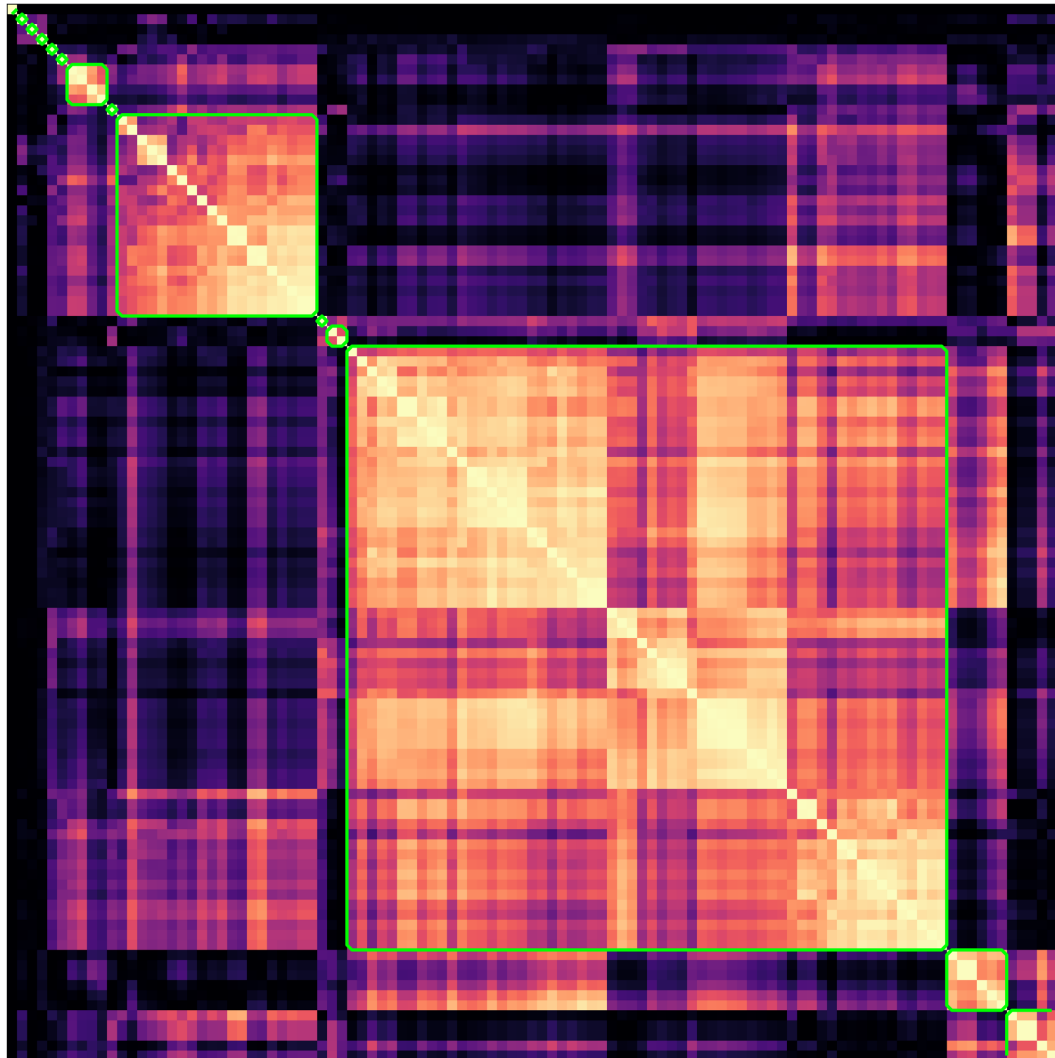

- Strength
- Sphericity
- Elongation
- Flatness
- Minimum
- Correlation
- Idm
- Kurtosis
- Skewness
- LargeAreaHighGrayLevelEmphasis
- Inc1
- Inc2
- MaximumZDDiameterSlice
- MajorAxisLength
- Maximum3DDiameter
- MaximumZDDiameterRow
- LeastAxisLength
- ZoneEntropy
- MaximumZDDiameterRow
- SurfaceVolumeRatio
- MaximumZDDiameterColumn
- MinorAxisLength
- RunLengthNonUniformity
- DependenceNonUniformity
- GrayLevelNonUniformity
- SurfaceArea
- GrayLevelNonUniformity
- Coarseness
- MeshVolume
- VoxelVolume
- SmallAreaLowGrayLevelEmphasis
- LargeDependenceHighGrayLevelEmphasis
- SmallDependenceLowGrayLevelEmphasis
- InverseVariance
- MaximumProbability
- SumEntropy
- JointEntropy
- Idm
- Id
- DifferenceEntropy
- Contrast
- DifferenceAverage
- DifferenceVariance
- SmallDependenceHighGrayLevelEmphasis
- InterquartileRange
- RobustMeanAbsoluteDeviation
- MeanAbsoluteDeviation
- Uniformity
- Entropy
- GrayLevelNonUniformityNormalized
- HighGrayLevelZoneEmphasis
- SmallAreaHighGrayLevelEmphasis
- ClusterTendency
- SumSquares
- GrayLevelNonUniformityNormalized
- GrayLevelVariance
- Variance
- GrayLevelVariance
- LongRunLowGrayLevelEmphasis
- LargeAreaLowGrayLevelEmphasis
- LargeDependenceLowGrayLevelEmphasis
- 10Percentile
- LowGrayLevelZoneEmphasis
- ShortRunLowGrayLevelEmphasis
- LowGrayLevelRunEmphasis
- LowGrayLevelEmphasis
- LongRunHighGrayLevelEmphasis
- 90Percentile
- ShortRunHighGrayLevelEmphasis
- HighGrayLevelRunEmphasis
- RootMeanSquared
- HighGrayLevelEmphasis
- Autocorrelation
- JointAverage
- Mean
- Median
- Busyness
- SizeZoneNonUniformityNormalized
- SmallAreaEmphasis
- Contrast
- DependenceVariance
- LongRunEmphasis
- RunVariance
- RunLengthNonUniformityNormalized
- ShortRunEmphasis
- ZonePercentage
- SmallDependenceEmphasis
- LargeAreaEmphasis
- ZoneVariance
- RunPercentage
- DependenceNonUniformityNormalized
- LargeDependenceEmphasis
- Complexity
- Maximum
- Range
- ClusterShade
- ClusterProminence
- GrayLevelVariance
- GrayLevelVariance
- SizeZoneNonUniformity
- Energy
- TotalEnergy
- RunEntropy
- DependenceEntropy
