# Supplementary material for: Inter- and Intra-Patient Repeatability of Radiomic Features from Multiparametric Whole-Body MRI in Patients with Metastatic Prostate Cancer
Source: MDPI journal article supplement (doi:10.3390/cancers16091647), 2024-04-25
Supplement: s1 [file s1]

firstorder

| Name                        | ICC inter<br>(95% CI) | ICC intra<br>(95% CI) | wLCV<br>(95% CI)       | blCV<br>(95% CI)      | bCV<br>(95% CI)      | RC<br>(95% CI)             | bias<br>(95% CI)         | -LoA (%)<br>(95% CI)       | +LoA (%)<br>(95% CI)       | R-hat<br>(range)     |
|-----------------------------|-----------------------|-----------------------|------------------------|-----------------------|----------------------|----------------------------|--------------------------|----------------------------|----------------------------|----------------------|
| 10Percentile                | 0.78<br>(0.44, 0.94)  | 0.85<br>(0.77, 0.91)  | 0.02<br>(0.01, 0.02)   | 0.04<br>(0.03, 0.05)  | 0.03<br>(0.01, 0.06) | 0.28<br>(0.23, 0.33)       | 0.04<br>(0.00, 0.07)     | -24.11<br>(-28.17, -20.89) | 31.77<br>(26.41, 39.22)    | 1.00<br>(1.00, 1.00) |
| 90Percentile                | 0.92<br>(0.76, 0.98)  | 0.93<br>(0.88, 0.96)  | 0.01<br>(0.01, 0.01)   | 0.03<br>(0.03, 0.04)  | 0.03<br>(0.02, 0.06) | 0.18<br>(0.15, 0.21)       | 0.01<br>(-0.02, 0.03)    | -16.32<br>(-19.28, -13.96) | 19.51<br>(16.23, 23.88)    | 1.00<br>(1.00, 1.00) |
| Energy                      | 0.84<br>(0.24, 0.97)  | 0.96<br>(0.94, 0.98)  | 0.01<br>(0.01, 0.01)   | 0.06<br>(0.05, 0.07)  | 0.02<br>(0.01, 0.06) | 0.57<br>(0.48, 0.69)       | -0.02<br>(-0.09, 0.05)   | -43.50<br>(-49.64, -38.26) | 76.98<br>(61.97, 98.55)    | 1.00<br>(1.00, 1.01) |
| Entropy                     | 0.80<br>(0.54, 0.94)  | 0.75<br>(0.61, 0.85)  | 0.11<br>(0.10, 0.14)   | 0.18<br>(0.14, 0.23)  | 0.20<br>(0.11, 0.41) | 0.26<br>(0.22, 0.31)       | -0.01<br>(-0.04, 0.02)   | -22.83<br>(-26.87, -19.74) | 29.58<br>(24.60, 36.74)    | 1.00<br>(1.00, 1.00) |
| InterquartileRange          | 0.81<br>(0.57, 0.94)  | 0.74<br>(0.60, 0.83)  | 0.04<br>(0.03, 0.05)   | 0.07<br>(0.05, 0.08)  | 0.08<br>(0.05, 0.15) | 0.57<br>(0.48, 0.69)       | -0.05<br>(-0.12, 0.03)   | -43.40<br>(-49.78, -38.17) | 76.69<br>(61.73, 99.13)    | 1.00<br>(1.00, 1.00) |
| Kurtosis                    | 0.61<br>(0.13, 0.89)  | 0.79<br>(0.67, 0.87)  | 0.18<br>(0.15, 0.22)   | 0.31<br>(0.24, 0.41)  | 0.19<br>(0.06, 0.44) | 0.60<br>(0.51, 0.73)       | 0.11<br>(0.04, 0.19)     | -45.26<br>(-51.74, -40.02) | 82.67<br>(66.73, 107.23)   | 1.00<br>(1.00, 1.01) |
| Maximum                     | 0.73<br>(0.35, 0.92)  | 0.85<br>(0.76, 0.91)  | 0.02<br>(0.01, 0.02)   | 0.04<br>(0.03, 0.05)  | 0.03<br>(0.01, 0.05) | 0.31<br>(0.27, 0.38)       | 0.03<br>(-0.01, 0.07)    | -26.93<br>(-31.48, -23.35) | 36.85<br>(30.47, 45.95)    | 1.00<br>(1.00, 1.00) |
| Mean                        | 0.93<br>(0.75, 0.98)  | 0.95<br>(0.91, 0.97)  | 0.01<br>(0.01, 0.01)   | 0.03<br>(0.03, 0.04)  | 0.03<br>(0.01, 0.06) | 0.15<br>(0.12, 0.17)       | 0.01<br>(-0.00, 0.03)    | -13.55<br>(-16.00, -11.63) | 15.67<br>(13.16, 19.04)    | 1.00<br>(1.00, 1.00) |
| MeanAbsoluteDeviation       | 0.80<br>(0.53, 0.94)  | 0.75<br>(0.62, 0.85)  | 0.04<br>(0.03, 0.05)   | 0.07<br>(0.06, 0.09)  | 0.08<br>(0.04, 0.15) | 0.53<br>(0.45, 0.64)       | -0.01<br>(-0.08, 0.05)   | -41.14<br>(-47.06, -36.15) | 69.90<br>(56.62, 88.90)    | 1.00<br>(1.00, 1.00) |
| Median                      | 0.93<br>(0.76, 0.98)  | 0.95<br>(0.92, 0.97)  | 0.01<br>(0.01, 0.01)   | 0.03<br>(0.03, 0.04)  | 0.03<br>(0.01, 0.06) | 0.14<br>(0.12, 0.17)       | 0.01<br>(-0.01, 0.03)    | -13.47<br>(-15.93, -11.54) | 15.56<br>(13.94, 18.95)    | 1.00<br>(1.00, 1.00) |
| Minimum                     | 0.40<br>(0.03, 0.77)  | 0.64<br>(0.45, 0.78)  | 1.44<br>(0.62, 33.25)  | 0.61<br>(0.43, 1.75)  | 0.31<br>(0.07, 0.77) | 448.29<br>(381.33, 541.89) | 35.40<br>(-21.76, 90.23) | N/A                        | N/A                        | 1.00<br>(1.00, 1.01) |
| Range                       | 0.68<br>(0.35, 0.90)  | 0.74<br>(0.61, 0.84)  | 0.03<br>(0.03, 0.04)   | 0.05<br>(0.04, 0.07)  | 0.05<br>(0.02, 0.09) | 0.61<br>(0.52, 0.73)       | 0.02<br>(-0.05, 0.10)    | -45.59<br>(-51.67, -40.34) | 83.81<br>(67.62, 106.91)   | 1.00<br>(1.00, 1.00) |
| RobustMeanAbsoluteDeviation | 0.82<br>(0.57, 0.94)  | 0.76<br>(0.62, 0.85)  | 0.05<br>(0.04, 0.06)   | 0.08<br>(0.06, 0.10)  | 0.09<br>(0.05, 0.18) | 0.54<br>(0.46, 0.66)       | -0.04<br>(-0.11, 0.03)   | -41.95<br>(-48.18, -37.01) | 72.27<br>(58.75, 92.97)    | 1.00<br>(1.00, 1.00) |
| RootMeanSquared             | 0.93<br>(0.75, 0.98)  | 0.95<br>(0.91, 0.97)  | 0.01<br>(0.01, 0.01)   | 0.03<br>(0.03, 0.04)  | 0.03<br>(0.01, 0.06) | 0.15<br>(0.12, 0.18)       | 0.01<br>(-0.01, 0.03)    | -13.59<br>(-16.14, -11.66) | 15.73<br>(13.20, 19.25)    | 1.00<br>(1.00, 1.00) |
| Skewness                    | 0.24<br>(0.01, 0.71)  | 0.70<br>(0.54, 0.81)  | 6.44<br>(1.93, 142.82) | 1.57<br>(0.87, 26.73) | 0.42<br>(0.08, 1.87) | 1.40<br>(1.19, 1.69)       | 0.17<br>(-0.01, 0.35)    | N/A                        | N/A                        | 1.00<br>(1.00, 1.01) |
| TotalEnergy                 | 0.85<br>(0.38, 0.97)  | 0.96<br>(0.94, 0.98)  | 0.01<br>(0.01, 0.01)   | 0.05<br>(0.04, 0.06)  | 0.02<br>(0.01, 0.05) | 0.57<br>(0.49, 0.69)       | -0.02<br>(-0.10, 0.05)   | -43.56<br>(-49.79, -38.56) | 77.18<br>(62.77, 99.18)    | 1.00<br>(1.00, 1.00) |
| Uniformity                  | 0.80<br>(0.55, 0.94)  | 0.73<br>(0.59, 0.83)  | 0.11<br>(0.10, 0.14)   | 0.18<br>(0.14, 0.23)  | 0.20<br>(0.12, 0.42) | 0.46<br>(0.39, 0.55)       | 0.02<br>(-0.03, 0.08)    | -36.69<br>(-42.41, -31.96) | 57.94<br>(46.98, 73.65)    | 1.00<br>(1.00, 1.00) |
| Variance                    | 0.77<br>(0.50, 0.93)  | 0.75<br>(0.61, 0.85)  | 0.04<br>(0.03, 0.05)   | 0.07<br>(0.05, 0.08)  | 0.07<br>(0.04, 0.14) | 1.08<br>(0.91, 1.31)       | 0.00<br>(-0.13, 0.14)    | -66.09<br>(-72.94, -59.87) | 194.92<br>(149.19, 269.55) | 1.00<br>(1.00, 1.00) |

glcm

| Name               | ICC inter<br>(95% CI) | ICC intra<br>(95% CI) | wLCV<br>(95% CI)        | blCV<br>(95% CI)       | bCV<br>(95% CI)       | RC<br>(95% CI)           | bias<br>(95% CI)        | -LoA (%)<br>(95% CI)       | +LoA (%)<br>(95% CI)        | R-hat<br>(range)     |
|--------------------|-----------------------|-----------------------|-------------------------|------------------------|-----------------------|--------------------------|-------------------------|----------------------------|-----------------------------|----------------------|
| Autocorrelation    | 0.64<br>(0.34, 0.88)  | 0.59<br>(0.41, 0.73)  | 0.17<br>(0.14, 0.20)    | 0.19<br>(0.14, 0.25)   | 0.20<br>(0.11, 0.41)  | 1.35<br>(1.15, 1.62)     | -0.08<br>(-0.25, 0.10)  | -74.07<br>(-80.13, -68.22) | 285.62<br>(214.71, 403.23)  | 1.00<br>(1.00, 1.00) |
| ClusterProminence  | 0.74<br>(0.43, 0.92)  | 0.77<br>(0.64, 0.86)  | 0.23<br>(0.19, 0.38)    | 0.34<br>(0.26, 0.47)   | 0.28<br>(0.14, 0.61)  | 2.36<br>(2.01, 2.84)     | 0.09<br>(-0.21, 0.39)   | -90.60<br>(-94.14, -86.58) | 964.01<br>(644.94, 1607.36) | 1.00<br>(1.00, 1.00) |
| ClusterShade       | 0.65<br>(0.10, 0.93)  | 0.95<br>(0.92, 0.97)  | 10.92<br>(3.25, 224.50) | 6.48<br>(1.94, 157.69) | 0.82<br>(0.18, 9.57)  | 94.63<br>(79.86, 113.85) | -4.92<br>(-17.02, 7.07) | N/A                        | N/A                         | 1.00<br>(1.00, 1.01) |
| ClusterTendency    | 0.80<br>(0.53, 0.94)  | 0.76<br>(0.62, 0.85)  | 0.82<br>(0.38, 16.03)   | 0.50<br>(0.37, 1.41)   | 0.43<br>(0.23, 0.98)  | 1.13<br>(0.95, 1.36)     | -0.02<br>(-0.16, 0.12)  | -67.61<br>(-74.33, -61.39) | 208.78<br>(158.98, 289.60)  | 1.00<br>(1.00, 1.00) |
| Contrast           | 0.70<br>(0.38, 0.91)  | 0.75<br>(0.62, 0.84)  | 3.39<br>(1.08, 73.03)   | 1.00<br>(0.60, 10.77)  | 0.52<br>(0.27, 1.38)  | 1.03<br>(0.88, 1.24)     | -0.02<br>(-0.15, 0.11)  | -64.36<br>(-71.06, -58.35) | 180.57<br>(140.10, 245.54)  | 1.00<br>(1.00, 1.00) |
| Correlation        | 0.18<br>(0.01, 0.58)  | 0.42<br>(0.20, 0.61)  | 0.70<br>(0.48, 10.13)   | 0.40<br>(0.26, 0.67)   | 0.21<br>(0.05, 0.54)  | 0.42<br>(0.36, 0.51)     | -0.00<br>(-0.06, 0.05)  | N/A                        | N/A                         | 1.00<br>(1.00, 1.01) |
| DifferenceAverage  | 0.70<br>(0.38, 0.90)  | 0.73<br>(0.59, 0.83)  | 4.10<br>(1.30, 87.84)   | 1.15<br>(1.42, 86.05)  | 1.47<br>(0.61, 17.57) | 0.56<br>(0.47, 0.67)     | -0.02<br>(-0.09, 0.05)  | -42.63<br>(-48.85, -37.56) | 74.30<br>(60.14, 95.49)     | 1.00<br>(1.00, 1.00) |
| DifferenceEntropy  | 0.74<br>(0.42, 0.92)  | 0.80<br>(0.68, 0.88)  | 0.20<br>(0.17, 0.27)    | 0.32<br>(0.26, 0.43)   | 0.25<br>(0.13, 0.54)  | 0.26<br>(0.22, 0.32)     | -0.00<br>(-0.04, 0.03)  | -23.14<br>(-27.24, -20.06) | 30.11<br>(25.09, 37.44)     | 1.00<br>(1.00, 1.00) |
| DifferenceVariance | 0.70<br>(0.37, 0.90)  | 0.78<br>(0.66, 0.86)  | 5.03<br>(1.54, 124.57)  | 4.97<br>(1.62, 107.95) | 1.95<br>(0.70, 33.44) | 0.96<br>(0.81, 1.15)     | -0.01<br>(-0.14, 0.11)  | -61.59<br>(-68.42, -55.54) | 160.34<br>(124.92, 216.62)  | 1.00<br>(1.00, 1.00) |
| Id                 | 0.62<br>(0.29, 0.87)  | 0.65<br>(0.48, 0.78)  | 0.18<br>(0.15, 0.22)    | 0.23<br>(0.18, 0.30)   | 0.20<br>(0.10, 0.41)  | 0.25<br>(0.21, 0.29)     | 0.01<br>(-0.02, 0.04)   | -21.75<br>(-25.50, -18.79) | 27.79<br>(23.14, 34.23)     | 1.00<br>(1.00, 1.00) |
| Idm                | 0.59<br>(0.25, 0.86)  | 0.65<br>(0.47, 0.77)  | 0.23<br>(0.19, 0.28)    | 0.27<br>(0.21, 0.36)   | 0.23<br>(0.11, 0.49)  | 0.34<br>(0.29, 0.41)     | 0.01<br>(-0.03, 0.05)   | -28.66<br>(-33.47, -24.93) | 40.17<br>(33.21, 50.32)     | 1.00<br>(1.00, 1.00) |
| Idmn               | 0.25<br>(0.02, 0.66)  | 0.62<br>(0.44, 0.76)  | 0.10<br>(0.08, 0.12)    | 0.13<br>(0.10, 0.16)   | 0.06<br>(0.01, 0.13)  | 1.02<br>(0.87, 1.25)     | -0.06<br>(-0.19, 0.07)  | -64.08<br>(-71.21, -57.99) | 178.39<br>(138.04, 247.33)  | 1.00<br>(1.00, 1.00) |
| Idn                | 0.34<br>(0.03, 0.74)  | 0.67<br>(0.50, 0.79)  | 0.08<br>(0.06, 0.09)    | 0.11<br>(0.08, 0.14)   | 0.05<br>(0.01, 0.13)  | 0.50<br>(0.42, 0.60)     | -0.03<br>(-0.09, 0.03)  | -39.09<br>(-44.85, -34.32) | 64.18<br>(52.25, 81.34)     | 1.00<br>(1.00, 1.00) |
| Imc1               | 0.47<br>(0.05, 0.83)  | 0.67<br>(0.50, 0.79)  | 0.13<br>(0.11, 0.15)    | 0.17<br>(0.13, 0.22)   | 0.11<br>(0.03, 0.26)  | 0.60<br>(0.51, 0.72)     | 0.03<br>(-0.05, 0.10)   | -44.90<br>(-51.38, -39.72) | 81.48<br>(65.90, 105.66)    | 1.00<br>(1.00, 1.00) |
| Imc2               | 0.59<br>(0.22, 0.87)  | 0.66<br>(0.49, 0.78)  | 0.61<br>(0.39, 8.96)    | 0.49<br>(0.36, 1.48)   | 0.35<br>(0.16, 0.85)  | 0.32<br>(0.27, 0.38)     | 0.01<br>(-0.03, 0.05)   | -27.16<br>(-31.81, -23.44) | 37.28<br>(30.62, 46.64)     | 1.00<br>(1.00, 1.00) |
| InverseVariance    | 0.27<br>(0.01, 0.71)  | 0.66<br>(0.50, 0.78)  | 0.11<br>(0.09, 0.13)    | 0.15<br>(0.11, 0.19)   | 0.06<br>(0.01, 0.16)  | 0.24<br>(0.20, 0.29)     | -0.01<br>(-0.05, 0.02)  | -21.03<br>(-24.81, -18.24) | 26.64<br>(22.32, 32.99)     | 1.00<br>(1.00, 1.00) |
| JointAverage       | 0.62<br>(0.31, 0.86)  | 0.59<br>(0.40, 0.74)  | 0.17<br>(0.14, 0.21)    | 0.19<br>(0.15, 0.25)   | 0.19<br>(0.10, 0.40)  | 0.69<br>(0.58, 0.82)     | -0.04<br>(-0.12, 0.05)  | -49.72<br>(-56.10, -43.95) | 98.87<br>(78.42, 127.77)    | 1.00<br>(1.00, 1.00) |
| JointEnergy        | 0.82<br>(0.57, 0.95)  | 0.82<br>(0.71, 0.89)  | 0.10<br>(0.09, 0.12)    | 0.20<br>(0.16, 0.26)   | 0.20<br>(0.11, 0.39)  | 0.71<br>(0.60, 0.86)     | 0.05<br>(-0.03, 0.15)   | -50.75<br>(-57.53, -45.03) | 103.03<br>(81.91, 135.47)   | 1.00<br>(1.00, 1.00) |
| JointEntropy       | 0.83<br>(0.60, 0.95)  | 0.83<br>(0.73, 0.90)  | 0.06<br>(0.05, 0.07)    | 0.12<br>(0.10, 0.16)   | 0.12<br>(0.07, 0.25)  | 0.23<br>(0.19, 0.27)     | -0.02<br>(-0.05, 0.01)  | -20.36<br>(-23.94, -17.55) | 25.57<br>(21.29, 31.48)     | 1.00<br>(1.00, 1.00) |
| MaximumProbability | 0.73<br>(0.43, 0.91)  | 0.73<br>(0.58, 0.83)  | 0.15<br>(0.12, 0.18)    | 0.22<br>(0.17, 0.28)   | 0.21<br>(0.11, 0.43)  | 0.73<br>(0.62, 0.89)     | 0.06<br>(-0.04, 0.15)   | -52.03<br>(-58.90, -46.23) | 108.44<br>(85.97, 143.31)   | 1.00<br>(1.00, 1.00) |
| SumEntropy         | 0.80<br>(0.56, 0.94)  | 0.75<br>(0.62, 0.84)  | 0.08<br>(0.07, 0.10)    | 0.14<br>(0.11, 0.18)   | 0.16<br>(0.09, 0.30)  | 0.24<br>(0.21, 0.29)     | -0.02<br>(-0.05, 0.01)  | -21.52<br>(-25.21, -18.56) | 27.42<br>(22.79, 33.71)     | 1.00<br>(1.00, 1.00) |
| SumSquares         | 0.81<br>(0.55, 0.94)  | 0.78<br>(0.66, 0.86)  | 2.91<br>(0.93, 64.06)   | 3.05<br>(1.06, 56.61)  | 0.82<br>(0.41, 3.33)  | 1.00<br>(0.85, 1.20)     | -0.02<br>(-0.14, 0.10)  | -63.08<br>(-70.03, -57.19) | 170.86<br>(133.61, 233.64)  | 1.00<br>(1.00, 1.00) |

gldm

| Name                    | ICC inter<br>(95% CI) | ICC intra<br>(95% CI) | wLCV<br>(95% CI)     | blCV<br>(95% CI)     | bCV<br>(95% CI)      | RC<br>(95% CI)       | bias<br>(95% CI)       | -LoA (%)<br>(95% CI)       | +LoA (%)<br>(95% CI)    | R-hat<br>(range)     |
|-------------------------|-----------------------|-----------------------|----------------------|----------------------|----------------------|----------------------|------------------------|----------------------------|-------------------------|----------------------|
| DependenceEntropy       | 0.64<br>(0.25, 0.89)  | 0.79<br>(0.67, 0.87)  | 0.03<br>(0.03, 0.04) | 0.06<br>(0.05, 0.08) | 0.04<br>(0.02, 0.09) | 0.14<br>(0.12, 0.17) | -0.00<br>(-0.02, 0.02) | -12.79<br>(-15.22, -11.00) | 14.67<br>(12.36, 17.95) | 1.00<br>(1.00, 1.00) |
| DependenceNonUniformity | 0.78<br>(0.20, 0.95)  | 0.94<br>(0.91, 0.96)  | 0.05<br>(0.04, 0.06) | 0.18<br>(0.15, 0.22) | 0.08<br>(0.02, 0.21) | 0.54<br>(0.46, 0.65) | -0.06<br>(-0.12, 0.01) | -42.01<br>(-47.85, -36.96) | 72.45<br>(58.64, 91.74) | 1.00<br>(1.00, 1.00) |

|                                      |                      |                      |                        |                       |                      |                      |                        |                            |                            |                      |
|--------------------------------------|----------------------|----------------------|------------------------|-----------------------|----------------------|----------------------|------------------------|----------------------------|----------------------------|----------------------|
| DependenceNonUniformityNormalized    | 0.65<br>(0.27, 0.89) | 0.72<br>(0.57, 0.83) | 0.10<br>(0.09, 0.12)   | 0.16<br>(0.12, 0.20)  | 0.13<br>(0.06, 0.27) | 0.36<br>(0.31, 0.44) | -0.01<br>(-0.06, 0.03) | -30.38<br>(-35.38, -26.51) | 43.63<br>(36.07, 54.75)    | 1.00<br>(1.00, 1.00) |
| DependenceVariance                   | 0.54<br>(0.15, 0.85) | 0.69<br>(0.52, 0.80) | 4.96<br>(1.54, 96.29)  | 2.42<br>(1.02, 46.75) | 0.82<br>(0.28, 4.89) | 0.79<br>(0.66, 0.95) | 0.01<br>(-0.09, 0.11)  | -54.41<br>(-61.30, -48.44) | 119.33<br>(93.95, 158.42)  | 1.00<br>(1.00, 1.01) |
| GrayLevelNonUniformity               | 0.80<br>(0.11, 0.96) | 0.95<br>(0.92, 0.97) | 0.05<br>(0.04, 0.06)   | 0.22<br>(0.18, 0.27)  | 0.10<br>(0.02, 0.25) | 0.55<br>(0.46, 0.66) | -0.02<br>(-0.09, 0.05) | -42.06<br>(-48.17, -37.14) | 72.58<br>(59.08, 92.95)    | 1.00<br>(1.00, 1.01) |
| GrayLevelVariance                    | 0.77<br>(0.49, 0.93) | 0.76<br>(0.62, 0.85) | 2.88<br>(0.95, 61.74)  | 1.84<br>(0.76, 42.81) | 0.66<br>(0.33, 2.03) | 1.03<br>(0.87, 1.25) | 0.01<br>(-0.12, 0.14)  | -64.28<br>(-71.22, -58.12) | 179.99<br>(138.76, 247.52) | 1.00<br>(1.00, 1.00) |
| HighGrayLevelEmphasis                | 0.65<br>(0.34, 0.88) | 0.60<br>(0.42, 0.75) | 0.15<br>(0.13, 0.18)   | 0.17<br>(0.13, 0.23)  | 0.18<br>(0.10, 0.37) | 1.25<br>(1.06, 1.50) | -0.05<br>(-0.21, 0.11) | -71.42<br>(-77.77, -65.52) | 249.95<br>(190.07, 349.75) | 1.00<br>(1.00, 1.00) |
| LargeDependenceEmphasis              | 0.68<br>(0.31, 0.90) | 0.73<br>(0.58, 0.83) | 0.12<br>(0.10, 0.14)   | 0.18<br>(0.15, 0.23)  | 0.16<br>(0.07, 0.34) | 0.60<br>(0.51, 0.72) | 0.02<br>(-0.06, 0.10)  | -45.01<br>(-51.39, -39.91) | 81.86<br>(66.42, 105.73)   | 1.00<br>(1.00, 1.00) |
| LargeDependenceHighGrayLevelEmphasis | 0.32<br>(0.02, 0.75) | 0.70<br>(0.53, 0.81) | 0.09<br>(0.08, 0.11)   | 0.13<br>(0.10, 0.17)  | 0.06<br>(0.01, 0.15) | 1.25<br>(1.06, 1.51) | -0.07<br>(-0.22, 0.09) | -71.24<br>(-77.87, -65.28) | 247.70<br>(188.05, 351.77) | 1.00<br>(1.00, 1.01) |
| LargeDependenceLowGrayLevelEmphasis  | 0.59<br>(0.27, 0.85) | 0.51<br>(0.29, 0.68) | 6.24<br>(1.93, 131.71) | 2.47<br>(0.91, 50.55) | 0.98<br>(0.47, 5.42) | 1.95<br>(1.65, 2.35) | 0.09<br>(-0.14, 0.33)  | -85.76<br>(-90.46, -80.78) | 602.49<br>(420.38, 947.73) | 1.00<br>(1.00, 1.00) |
| LowGrayLevelEmphasis                 | 0.50<br>(0.17, 0.81) | 0.62<br>(0.44, 0.76) | 0.23<br>(0.19, 0.29)   | 0.26<br>(0.19, 0.34)  | 0.19<br>(0.09, 0.39) | 1.43<br>(1.21, 1.72) | 0.03<br>(-0.15, 0.22)  | -75.98<br>(-82.06, -70.13) | 316.28<br>(234.76, 457.45) | 1.00<br>(1.00, 1.00) |
| SmallDependenceEmphasis              | 0.68<br>(0.34, 0.90) | 0.72<br>(0.57, 0.82) | 0.17<br>(0.15, 0.21)   | 0.26<br>(0.20, 0.35)  | 0.22<br>(0.11, 0.47) | 0.41<br>(0.35, 0.50) | -0.02<br>(-0.07, 0.04) | -33.89<br>(-39.21, -29.76) | 51.26<br>(42.36, 64.49)    | 1.00<br>(1.00, 1.00) |
| SmallDependenceHighGrayLevelEmphasis | 0.70<br>(0.40, 0.90) | 0.63<br>(0.44, 0.76) | 0.31<br>(0.24, 1.68)   | 0.30<br>(0.23, 0.45)  | 0.31<br>(0.17, 0.66) | 1.40<br>(1.18, 1.70) | -0.02<br>(-0.20, 0.16) | -75.37<br>(-81.80, -69.33) | 306.05<br>(226.05, 449.38) | 1.00<br>(1.00, 1.01) |
| SmallDependenceLowGrayLevelEmphasis  | 0.41<br>(0.02, 0.80) | 0.73<br>(0.58, 0.83) | 0.12<br>(0.10, 0.14)   | 0.19<br>(0.15, 0.24)  | 0.09<br>(0.02, 0.22) | 1.12<br>(0.95, 1.35) | -0.03<br>(-0.17, 0.11) | -67.39<br>(-74.06, -61.29) | 206.69<br>(158.30, 285.53) | 1.00<br>(1.00, 1.01) |

| Name                             | ICC inter<br>(95% CI) | ICC intra<br>(95% CI) | wICV<br>(95% CI)      | bICV<br>(95% CI)      | bCV<br>(95% CI)      | RC<br>(95% CI)       | bias<br>(95% CI)       | -LoA (%)<br>(95% CI)       | +LoA (%)<br>(95% CI)       | R-hat<br>(range)     |
|----------------------------------|-----------------------|-----------------------|-----------------------|-----------------------|----------------------|----------------------|------------------------|----------------------------|----------------------------|----------------------|
| GrayLevelNonUniformity           | 0.83<br>(0.25, 0.97)  | 0.96<br>(0.94, 0.98)  | 0.05<br>(0.04, 0.06)  | 0.22<br>(0.18, 0.27)  | 0.10<br>(0.02, 0.25) | 0.46<br>(0.39, 0.55) | -0.03<br>(-0.09, 0.03) | -36.74<br>(-42.18, -32.08) | 58.07<br>(47.23, 72.95)    | 1.00<br>(1.00, 1.00) |
| GrayLevelNonUniformityNormalized | 0.79<br>(0.52, 0.94)  | 0.72<br>(0.57, 0.82)  | 0.10<br>(0.09, 0.13)  | 0.16<br>(0.12, 0.20)  | 0.18<br>(0.10, 0.37) | 0.44<br>(0.37, 0.54) | 0.02<br>(-0.04, 0.08)  | -35.86<br>(-41.63, -31.12) | 55.90<br>(45.18, 71.31)    | 1.00<br>(1.00, 1.00) |
| GrayLevelVariance                | 0.75<br>(0.45, 0.92)  | 0.75<br>(0.60, 0.84)  | 2.99<br>(0.95, 60.72) | 1.09<br>(0.60, 14.50) | 0.57<br>(0.30, 1.54) | 1.02<br>(0.86, 1.23) | 0.02<br>(-0.11, 0.14)  | -63.81<br>(-70.82, -57.68) | 176.30<br>(136.31, 242.68) | 1.00<br>(1.00, 1.00) |
| HighGrayLevelRunEmphasis         | 0.65<br>(0.34, 0.88)  | 0.61<br>(0.42, 0.75)  | 0.14<br>(0.12, 0.17)  | 0.17<br>(0.13, 0.22)  | 0.18<br>(0.10, 0.37) | 1.23<br>(1.04, 1.48) | -0.04<br>(-0.19, 0.11) | -70.69<br>(-77.17, -64.74) | 241.15<br>(183.58, 338.07) | 1.00<br>(1.00, 1.00) |
| LongRunEmphasis                  | 0.67<br>(0.31, 0.90)  | 0.79<br>(0.67, 0.87)  | 0.20<br>(0.17, 0.25)  | 0.34<br>(0.27, 0.46)  | 0.24<br>(0.11, 0.51) | 0.34<br>(0.29, 0.41) | 0.02<br>(-0.02, 0.06)  | -28.95<br>(-33.57, -25.19) | 40.75<br>(33.67, 50.54)    | 1.00<br>(1.00, 1.00) |
| LongRunHighGrayLevelEmphasis     | 0.53<br>(0.19, 0.84)  | 0.61<br>(0.41, 0.75)  | 0.11<br>(0.09, 0.13)  | 0.13<br>(0.10, 0.18)  | 0.11<br>(0.05, 0.24) | 1.19<br>(1.00, 1.43) | -0.05<br>(-0.19, 0.11) | -69.56<br>(-76.18, -63.19) | 228.51<br>(171.67, 319.80) | 1.00<br>(1.00, 1.00) |
| LongRunLowGrayLevelEmphasis      | 0.58<br>(0.25, 0.85)  | 0.61<br>(0.43, 0.75)  | 1.01<br>(0.45, 17.13) | 0.44<br>(0.32, 0.93)  | 0.34<br>(0.17, 0.81) | 1.61<br>(1.37, 1.96) | 0.06<br>(-0.14, 0.27)  | -80.07<br>(-85.94, -74.61) | 401.81<br>(293.90, 611.06) | 1.00<br>(1.00, 1.00) |
| LowGrayLevelRunEmphasis          | 0.51<br>(0.15, 0.84)  | 0.64<br>(0.46, 0.77)  | 0.22<br>(0.18, 0.28)  | 0.26<br>(0.20, 0.34)  | 0.19<br>(0.08, 0.43) | 1.38<br>(1.17, 1.67) | 0.03<br>(-0.15, 0.20)  | -74.78<br>(-81.09, -68.82) | 296.45<br>(220.73, 428.93) | 1.00<br>(1.00, 1.00) |
| RunEntropy                       | 0.72<br>(0.41, 0.91)  | 0.75<br>(0.61, 0.84)  | 0.05<br>(0.04, 0.06)  | 0.08<br>(0.07, 0.10)  | 0.08<br>(0.04, 0.15) | 0.16<br>(0.14, 0.19) | -0.00<br>(-0.02, 0.02) | -14.89<br>(-17.69, -12.78) | 17.49<br>(14.65, 21.49)    | 1.00<br>(1.00, 1.00) |
| RunLengthNonUniformity           | 0.80<br>(0.13, 0.96)  | 0.96<br>(0.93, 0.97)  | 0.04<br>(0.03, 0.04)  | 0.17<br>(0.14, 0.21)  | 0.07<br>(0.01, 0.18) | 0.52<br>(0.44, 0.62) | -0.06<br>(-0.12, 0.02) | -40.39<br>(-46.41, -35.54) | 67.75<br>(55.14, 86.60)    | 1.00<br>(1.00, 1.01) |
| RunLengthNonUniformityNormalized | 0.49<br>(0.15, 0.82)  | 0.69<br>(0.53, 0.80)  | 0.24<br>(0.20, 0.30)  | 0.31<br>(0.24, 0.40)  | 0.20<br>(0.08, 0.43) | 0.20<br>(0.17, 0.25) | -0.01<br>(-0.03, 0.02) | -18.49<br>(-21.79, -15.88) | 22.68<br>(18.88, 27.86)    | 1.00<br>(1.00, 1.00) |
| RunPercentage                    | 0.57<br>(0.20, 0.86)  | 0.75<br>(0.61, 0.84)  | 0.23<br>(0.19, 0.29)  | 0.34<br>(0.26, 0.44)  | 0.22<br>(0.09, 0.47) | 0.11<br>(0.09, 0.13) | -0.01<br>(-0.02, 0.01) | -10.51<br>(-12.52, -8.95)  | 11.74<br>(9.83, 14.31)     | 1.00<br>(1.00, 1.00) |
| RunVariance                      | 0.58<br>(0.18, 0.86)  | 0.75<br>(0.62, 0.84)  | 2.56<br>(0.84, 61.78) | 0.64<br>(0.47, 1.27)  | 0.36<br>(0.14, 0.84) | 0.80<br>(0.67, 0.97) | 0.02<br>(-0.08, 0.12)  | -54.93<br>(-61.99, -49.06) | 121.88<br>(96.30, 163.06)  | 1.00<br>(1.00, 1.00) |
| ShortRunEmphasis                 | 0.53<br>(0.18, 0.83)  | 0.68<br>(0.51, 0.80)  | 0.27<br>(0.22, 0.36)  | 0.34<br>(0.26, 0.45)  | 0.23<br>(0.10, 0.49) | 0.10<br>(0.08, 0.12) | -0.01<br>(-0.02, 0.01) | -9.51<br>(-11.37, -8.12)   | 10.51<br>(8.84, 12.83)     | 1.00<br>(1.00, 1.00) |
| ShortRunHighGrayLevelEmphasis    | 0.66<br>(0.35, 0.89)  | 0.62<br>(0.43, 0.75)  | 0.16<br>(0.13, 0.19)  | 0.19<br>(0.14, 0.24)  | 0.19<br>(0.11, 0.40) | 1.25<br>(1.05, 1.50) | -0.04<br>(-0.19, 0.12) | -71.31<br>(-77.76, -65.12) | 248.57<br>(186.72, 349.66) | 1.00<br>(1.00, 1.00) |
| ShortRunLowGrayLevelEmphasis     | 0.51<br>(0.17, 0.83)  | 0.66<br>(0.48, 0.78)  | 0.19<br>(0.16, 0.24)  | 0.24<br>(0.19, 0.31)  | 0.17<br>(0.08, 0.37) | 1.31<br>(1.11, 1.58) | 0.01<br>(-0.15, 0.19)  | -72.98<br>(-79.40, -67.06) | 270.11<br>(203.58, 385.48) | 1.00<br>(1.00, 1.00) |

| Name                             | ICC inter<br>(95% CI) | ICC intra<br>(95% CI) | wICV<br>(95% CI)      | bICV<br>(95% CI)     | bCV<br>(95% CI)      | RC<br>(95% CI)       | bias<br>(95% CI)       | -LoA (%)<br>(95% CI)       | +LoA (%)<br>(95% CI)       | R-hat<br>(range)     |
|----------------------------------|-----------------------|-----------------------|-----------------------|----------------------|----------------------|----------------------|------------------------|----------------------------|----------------------------|----------------------|
| GrayLevelNonUniformity           | 0.70<br>(0.07, 0.95)  | 0.95<br>(0.92, 0.97)  | 0.05<br>(0.05, 0.07)  | 0.23<br>(0.19, 0.29) | 0.08<br>(0.01, 0.22) | 0.44<br>(0.37, 0.53) | -0.04<br>(-0.10, 0.01) | -35.55<br>(-41.19, -31.13) | 55.15<br>(45.20, 70.04)    | 1.00<br>(1.00, 1.01) |
| GrayLevelNonUniformityNormalized | 0.73<br>(0.44, 0.92)  | 0.68<br>(0.52, 0.80)  | 0.09<br>(0.08, 0.11)  | 0.13<br>(0.10, 0.17) | 0.14<br>(0.08, 0.28) | 0.44<br>(0.37, 0.54) | 0.02<br>(-0.04, 0.07)  | -35.86<br>(-41.44, -31.26) | 55.92<br>(45.47, 70.76)    | 1.00<br>(1.00, 1.00) |
| GrayLevelVariance                | 0.68<br>(0.36, 0.90)  | 0.70<br>(0.54, 0.81)  | 1.35<br>(0.52, 27.73) | 0.55<br>(0.39, 2.10) | 0.41<br>(0.21, 0.97) | 1.02<br>(0.87, 1.23) | 0.03<br>(-0.10, 0.16)  | -64.12<br>(-70.90, -58.00) | 178.69<br>(138.09, 243.60) | 1.00<br>(1.00, 1.00) |
| HighGrayLevelZoneEmphasis        | 0.65<br>(0.33, 0.88)  | 0.63<br>(0.44, 0.76)  | 0.13<br>(0.11, 0.16)  | 0.16<br>(0.12, 0.21) | 0.17<br>(0.09, 0.33) | 1.17<br>(0.98, 1.41) | -0.02<br>(-0.16, 0.13) | -68.83<br>(-75.59, -62.62) | 220.84<br>(167.52, 309.68) | 1.00<br>(1.00, 1.00) |
| LargeAreaEmphasis                | 0.74<br>(0.37, 0.93)  | 0.83<br>(0.73, 0.90)  | 0.17<br>(0.14, 0.21)  | 0.33<br>(0.26, 0.45) | 0.23<br>(0.10, 0.51) | 0.84<br>(0.71, 1.02) | 0.04<br>(-0.06, 0.15)  | -56.98<br>(-63.87, -50.97) | 132.43<br>(103.97, 176.74) | 1.00<br>(1.00, 1.00) |

|                                 |                      |                      |                        |                       |                       |                      |                        |                            |                             |                      |
|---------------------------------|----------------------|----------------------|------------------------|-----------------------|-----------------------|----------------------|------------------------|----------------------------|-----------------------------|----------------------|
| LargeAreaHighGrayLevelEmphasis  | 0.26<br>(0.01, 0.74) | 0.80<br>(0.70, 0.88) | 0.08<br>(0.07, 0.10)   | 0.16<br>(0.13, 0.19)  | 0.05<br>(0.01, 0.13)  | 1.17<br>(0.99, 1.40) | -0.03<br>(-0.18, 0.11) | -68.85<br>(-75.38, -62.75) | 221.03<br>(168.43, 306.14)  | 1.00<br>(1.00, 1.02) |
| LargeAreaLowGrayLevelEmphasis   | 0.66<br>(0.36, 0.88) | 0.58<br>(0.38, 0.73) | 6.61<br>(2.03, 130.64) | 3.93<br>(1.29, 75.68) | 1.66<br>(0.68, 24.05) | 2.04<br>(1.72, 2.45) | 0.09<br>(-0.17, 0.36)  | -86.94<br>(-91.36, -82.16) | 665.70<br>(460.65, 1058.07) | 1.00<br>(1.00, 1.00) |
| LowGrayLevelZoneEmphasis        | 0.57<br>(0.22, 0.85) | 0.66<br>(0.49, 0.79) | 0.21<br>(0.17, 0.26)   | 0.26<br>(0.20, 0.34)  | 0.20<br>(0.10, 0.45)  | 1.27<br>(1.07, 1.53) | 0.00<br>(-0.16, 0.16)  | -71.91<br>(-78.37, -65.82) | 255.97<br>(192.60, 362.40)  | 1.00<br>(1.00, 1.00) |
| SizeZoneNonUniformity           | 0.75<br>(0.32, 0.94) | 0.88<br>(0.82, 0.93) | 0.09<br>(0.07, 0.10)   | 0.22<br>(0.19, 0.28)  | 0.14<br>(0.05, 0.30)  | 0.87<br>(0.73, 1.04) | -0.07<br>(-0.18, 0.05) | -57.96<br>(-64.65, -51.89) | 137.85<br>(107.88, 182.92)  | 1.00<br>(1.00, 1.00) |
| SizeZoneNonUniformityNormalized | 0.57<br>(0.22, 0.86) | 0.61<br>(0.42, 0.76) | 0.17<br>(0.14, 0.20)   | 0.20<br>(0.15, 0.26)  | 0.18<br>(0.08, 0.39)  | 0.42<br>(0.36, 0.52) | -0.01<br>(-0.06, 0.05) | -34.61<br>(-40.31, -30.18) | 52.93<br>(43.23, 67.52)     | 1.00<br>(1.00, 1.00) |
| SmallAreaEmphasis               | 0.52<br>(0.17, 0.82) | 0.57<br>(0.36, 0.72) | 0.22<br>(0.19, 0.28)   | 0.24<br>(0.18, 0.33)  | 0.20<br>(0.09, 0.44)  | 0.26<br>(0.22, 0.31) | -0.01<br>(-0.04, 0.02) | -22.84<br>(-26.94, -19.70) | 29.61<br>(24.54, 36.88)     | 1.00<br>(1.00, 1.00) |
| SmallAreaHighGrayLevelEmphasis  | 0.67<br>(0.36, 0.89) | 0.65<br>(0.47, 0.77) | 0.17<br>(0.14, 0.20)   | 0.21<br>(0.16, 0.27)  | 0.21<br>(0.11, 0.42)  | 1.24<br>(1.05, 1.49) | 0.01<br>(-0.15, 0.16)  | -71.04<br>(-77.57, -64.86) | 245.34<br>(184.57, 345.93)  | 1.00<br>(1.00, 1.00) |
| SmallAreaLowGrayLevelEmphasis   | 0.50<br>(0.11, 0.83) | 0.69<br>(0.53, 0.80) | 0.14<br>(0.12, 0.17)   | 0.20<br>(0.16, 0.26)  | 0.14<br>(0.05, 0.30)  | 1.12<br>(0.95, 1.35) | -0.06<br>(-0.21, 0.07) | -67.45<br>(-74.20, -61.22) | 207.18<br>(157.86, 287.57)  | 1.00<br>(1.00, 1.00) |
| ZoneEntropy                     | 0.58<br>(0.11, 0.88) | 0.84<br>(0.75, 0.90) | 0.03<br>(0.02, 0.03)   | 0.07<br>(0.05, 0.08)  | 0.03<br>(0.01, 0.08)  | 0.12<br>(0.10, 0.14) | 0.00<br>(-0.01, 0.02)  | -11.19<br>(-13.41, -9.62)  | 12.60<br>(10.65, 15.48)     | 1.00<br>(1.00, 1.00) |
| ZonePercentage                  | 0.71<br>(0.36, 0.91) | 0.78<br>(0.66, 0.86) | 0.19<br>(0.16, 0.26)   | 0.32<br>(0.25, 0.45)  | 0.25<br>(0.12, 0.53)  | 0.35<br>(0.29, 0.41) | -0.02<br>(-0.06, 0.03) | -29.21<br>(-33.92, -25.37) | 41.27<br>(33.99, 51.32)     | 1.00<br>(1.00, 1.00) |
| ZoneVariance                    | 0.72<br>(0.30, 0.92) | 0.84<br>(0.74, 0.90) | 2.64<br>(0.85, 55.53)  | 1.05<br>(0.65, 16.07) | 0.49<br>(0.19, 1.39)  | 1.15<br>(0.98, 1.39) | 0.06<br>(-0.09, 0.20)  | -68.27<br>(-75.05, -62.30) | 215.12<br>(165.24, 300.74)  | 1.00<br>(1.00, 1.00) |

ngtdm

| Name       | ICC inter<br>(95% CI) | ICC intra<br>(95% CI) | wICV<br>(95% CI)       | bICV<br>(95% CI)       | bCV<br>(95% CI)       | RC<br>(95% CI)       | bias<br>(95% CI)       | -LoA (%)<br>(95% CI)       | +LoA (%)<br>(95% CI)       | R-hat<br>(range)     |
|------------|-----------------------|-----------------------|------------------------|------------------------|-----------------------|----------------------|------------------------|----------------------------|----------------------------|----------------------|
| Busyness   | 0.53<br>(0.14, 0.84)  | 0.57<br>(0.36, 0.72)  | 8.08<br>(2.41, 164.49) | 5.37<br>(1.63, 117.69) | 2.29<br>(0.75, 52.14) | 1.26<br>(1.07, 1.51) | -0.01<br>(-0.17, 0.15) | -71.71<br>(-78.01, -65.65) | 253.46<br>(191.11, 354.73) | 1.00<br>(1.00, 1.00) |
| Coarseness | 0.79<br>(0.18, 0.96)  | 0.96<br>(0.94, 0.98)  | 0.05<br>(0.04, 0.06)   | 0.24<br>(0.20, 0.29)   | 0.09<br>(0.02, 0.23)  | 0.49<br>(0.41, 0.59) | 0.02<br>(-0.04, 0.08)  | -38.60<br>(-44.56, -33.73) | 62.86<br>(50.90, 80.38)    | 1.00<br>(1.00, 1.01) |
| Complexity | 0.70<br>(0.36, 0.91)  | 0.78<br>(0.65, 0.86)  | 0.16<br>(0.14, 0.20)   | 0.27<br>(0.22, 0.35)   | 0.21<br>(0.10, 0.44)  | 1.40<br>(1.18, 1.69) | 0.06<br>(-0.11, 0.24)  | -75.29<br>(-81.51, -69.31) | 304.70<br>(225.80, 440.97) | 1.00<br>(1.00, 1.00) |
| Contrast   | 0.62<br>(0.24, 0.88)  | 0.74<br>(0.60, 0.83)  | 0.12<br>(0.10, 0.14)   | 0.19<br>(0.15, 0.24)   | 0.14<br>(0.06, 0.31)  | 0.91<br>(0.77, 1.09) | -0.03<br>(-0.14, 0.09) | -59.70<br>(-66.52, -53.75) | 148.15<br>(116.20, 198.69) | 1.00<br>(1.00, 1.00) |
| Strength   | 0.40<br>(0.04, 0.80)  | 0.70<br>(0.54, 0.81)  | 6.37<br>(1.91, 152.03) | 9.60<br>(2.50, 208.56) | 2.84<br>(0.66, 62.63) | 1.25<br>(1.06, 1.51) | 0.13<br>(-0.02, 0.29)  | -71.40<br>(-77.98, -65.46) | 249.69<br>(189.51, 354.07) | 1.00<br>(1.00, 1.01) |

shape

| Name                    | ICC inter<br>(95% CI) | ICC intra<br>(95% CI) | wICV<br>(95% CI)     | bICV<br>(95% CI)     | bCV<br>(95% CI)      | RC<br>(95% CI)       | bias<br>(95% CI)       | -LoA (%)<br>(95% CI)       | +LoA (%)<br>(95% CI)    | R-hat<br>(range)     |
|-------------------------|-----------------------|-----------------------|----------------------|----------------------|----------------------|----------------------|------------------------|----------------------------|-------------------------|----------------------|
| Elongation              | 0.38<br>(0.02, 0.82)  | 0.86<br>(0.78, 0.92)  | 0.50<br>(0.34, 5.40) | 0.64<br>(0.49, 1.02) | 0.19<br>(0.03, 0.55) | 0.24<br>(0.21, 0.29) | 0.01<br>(-0.02, 0.04)  | -21.66<br>(-25.28, -18.65) | 27.65<br>(22.93, 33.84) | 1.00<br>(1.00, 1.00) |
| Flatness                | 0.37<br>(0.02, 0.83)  | 0.85<br>(0.76, 0.91)  | 0.20<br>(0.16, 0.26) | 0.37<br>(0.29, 0.48) | 0.12<br>(0.02, 0.34) | 0.30<br>(0.25, 0.36) | -0.02<br>(-0.06, 0.02) | -25.96<br>(-30.46, -22.44) | 35.05<br>(28.94, 43.80) | 1.00<br>(1.00, 1.00) |
| LeastAxisLength         | 0.33<br>(0.02, 0.85)  | 0.92<br>(0.87, 0.95)  | 0.04<br>(0.03, 0.04) | 0.12<br>(0.10, 0.15) | 0.03<br>(0.00, 0.09) | 0.27<br>(0.23, 0.33) | -0.03<br>(-0.07, 0.00) | -23.80<br>(-27.95, -20.57) | 31.24<br>(25.89, 38.79) | 1.00<br>(1.00, 1.02) |
| MajorAxisLength         | 0.76<br>(0.08, 0.95)  | 0.94<br>(0.90, 0.96)  | 0.03<br>(0.02, 0.03) | 0.11<br>(0.09, 0.13) | 0.05<br>(0.01, 0.12) | 0.26<br>(0.22, 0.31) | -0.01<br>(-0.05, 0.02) | -23.08<br>(-26.94, -19.93) | 30.00<br>(24.89, 36.88) | 1.00<br>(1.00, 1.01) |
| Maximum2DDiameterColumn | 0.47<br>(0.03, 0.89)  | 0.94<br>(0.90, 0.96)  | 0.03<br>(0.02, 0.03) | 0.11<br>(0.09, 0.13) | 0.03<br>(0.01, 0.08) | 0.26<br>(0.22, 0.31) | -0.02<br>(-0.06, 0.01) | -22.83<br>(-26.85, -19.73) | 29.58<br>(24.58, 36.71) | 1.00<br>(1.00, 1.00) |
| Maximum2DDiameterRow    | 0.66<br>(0.06, 0.93)  | 0.94<br>(0.90, 0.96)  | 0.03<br>(0.02, 0.03) | 0.11<br>(0.09, 0.13) | 0.04<br>(0.01, 0.10) | 0.26<br>(0.22, 0.31) | 0.00<br>(-0.03, 0.04)  | -23.04<br>(-26.98, -19.95) | 29.94<br>(24.93, 36.95) | 1.00<br>(1.00, 1.01) |
| Maximum2DDiameterSlice  | 0.77<br>(0.12, 0.95)  | 0.94<br>(0.90, 0.96)  | 0.03<br>(0.02, 0.03) | 0.10<br>(0.08, 0.13) | 0.05<br>(0.01, 0.12) | 0.24<br>(0.20, 0.29) | -0.02<br>(-0.05, 0.01) | -21.36<br>(-25.22, -18.41) | 27.16<br>(22.57, 33.72) | 1.00<br>(1.00, 1.00) |
| Maximum3DDiameter       | 0.73<br>(0.07, 0.95)  | 0.94<br>(0.90, 0.96)  | 0.03<br>(0.02, 0.03) | 0.10<br>(0.09, 0.13) | 0.04<br>(0.01, 0.11) | 0.25<br>(0.21, 0.31) | -0.01<br>(-0.04, 0.02) | -22.35<br>(-26.31, -19.27) | 28.78<br>(23.88, 35.71) | 1.00<br>(1.00, 1.01) |
| MeshVolume              | 0.79<br>(0.15, 0.96)  | 0.96<br>(0.94, 0.98)  | 0.02<br>(0.02, 0.03) | 0.11<br>(0.09, 0.13) | 0.04<br>(0.01, 0.11) | 0.49<br>(0.42, 0.60) | -0.05<br>(-0.11, 0.02) | -39.02<br>(-45.21, -34.16) | 63.98<br>(51.88, 82.51) | 1.00<br>(1.00, 1.00) |
| MinorAxisLength         | 0.70<br>(0.07, 0.94)  | 0.95<br>(0.91, 0.97)  | 0.03<br>(0.02, 0.03) | 0.11<br>(0.09, 0.13) | 0.04<br>(0.01, 0.10) | 0.21<br>(0.18, 0.26) | -0.00<br>(-0.03, 0.02) | -19.21<br>(-22.75, -16.57) | 23.78<br>(19.86, 29.45) | 1.00<br>(1.00, 1.01) |
| Sphericity              | 0.17<br>(0.01, 0.73)  | 0.87<br>(0.79, 0.92)  | 0.15<br>(0.13, 0.18) | 0.34<br>(0.27, 0.43) | 0.06<br>(0.01, 0.22) | 0.12<br>(0.10, 0.14) | 0.00<br>(-0.01, 0.02)  | -11.28<br>(-13.34, -9.62)  | 12.71<br>(10.65, 15.40) | 1.00<br>(1.00, 1.01) |
| SurfaceArea             | 0.76<br>(0.14, 0.96)  | 0.96<br>(0.93, 0.98)  | 0.02<br>(0.02, 0.02) | 0.09<br>(0.07, 0.11) | 0.03<br>(0.01, 0.09) | 0.38<br>(0.33, 0.46) | -0.03<br>(-0.08, 0.02) | -31.86<br>(-37.17, -27.84) | 46.76<br>(38.58, 59.16) | 1.00<br>(1.00, 1.01) |
| SurfaceVolumeRatio      | 0.64<br>(0.04, 0.94)  | 0.95<br>(0.92, 0.97)  | 0.07<br>(0.06, 0.09) | 0.29<br>(0.24, 0.36) | 0.09<br>(0.01, 0.26) | 0.17<br>(0.14, 0.21) | 0.01<br>(-0.01, 0.04)  | -15.75<br>(-18.54, -13.43) | 18.70<br>(15.52, 22.76) | 1.00<br>(1.00, 1.01) |
| VoxelVolume             | 0.80<br>(0.21, 0.96)  | 0.96<br>(0.94, 0.98)  | 0.02<br>(0.02, 0.02) | 0.11<br>(0.09, 0.13) | 0.04<br>(0.01, 0.10) | 0.48<br>(0.40, 0.58) | -0.04<br>(-0.10, 0.02) | -37.97<br>(-43.78, -33.20) | 61.21<br>(49.69, 77.87) | 1.00<br>(1.00, 1.01) |
