# Supplementary figures and images for: Inter- and Intra-Patient Repeatability of Radiomic Features from Multiparametric Whole-Body MRI in Patients with Metastatic Prostate Cancer
Source: MDPI journal article supplement (doi:10.3390/cancers16091647), 2024-04-25

ADC

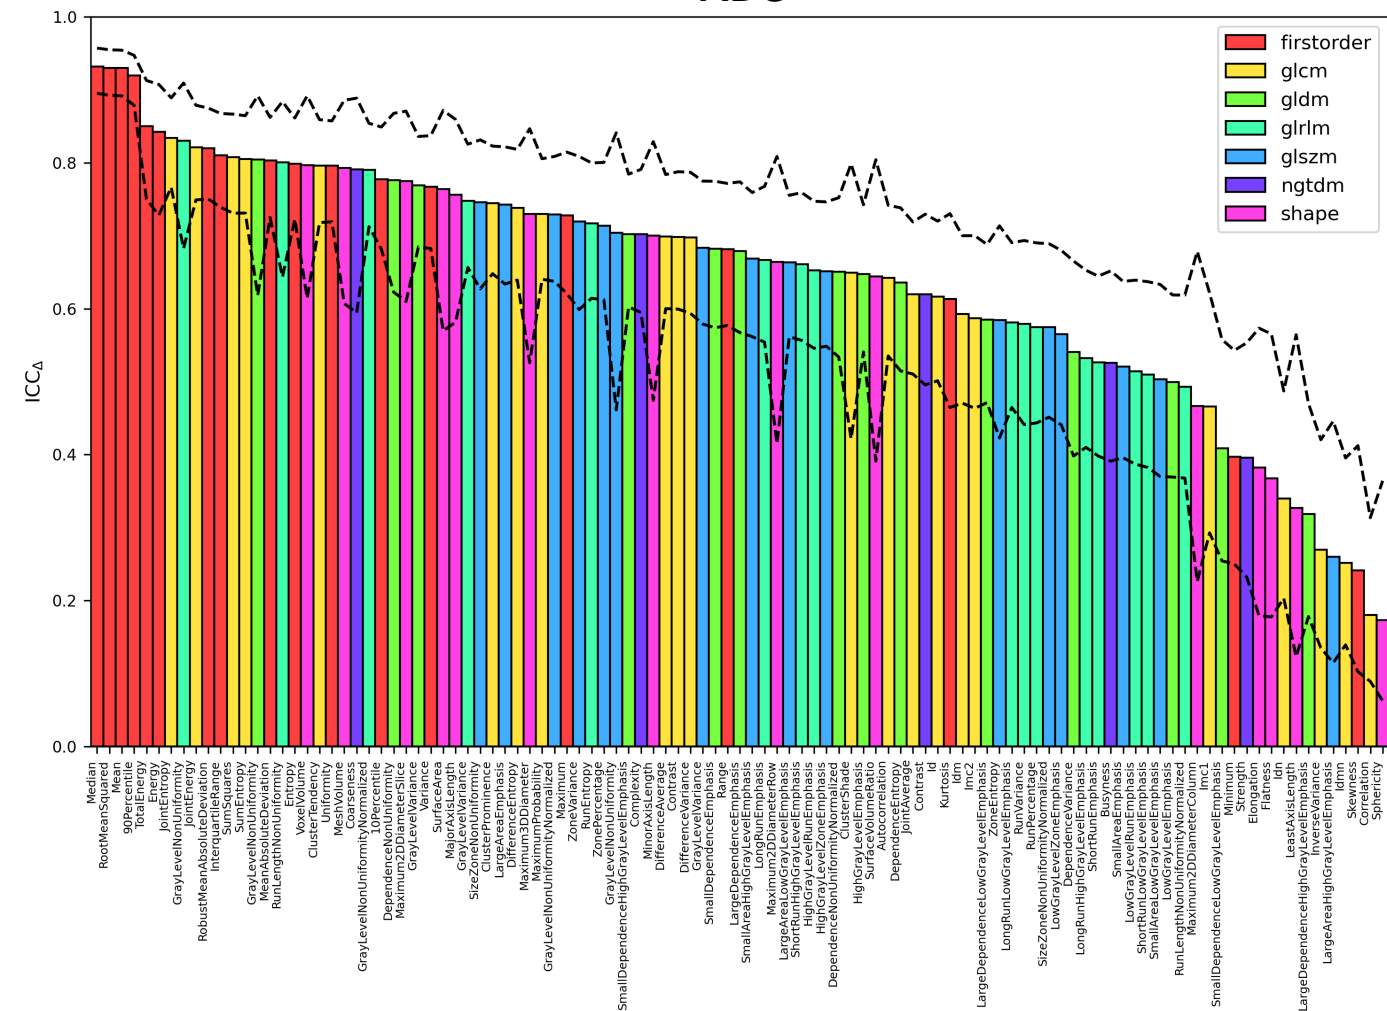

rFF%

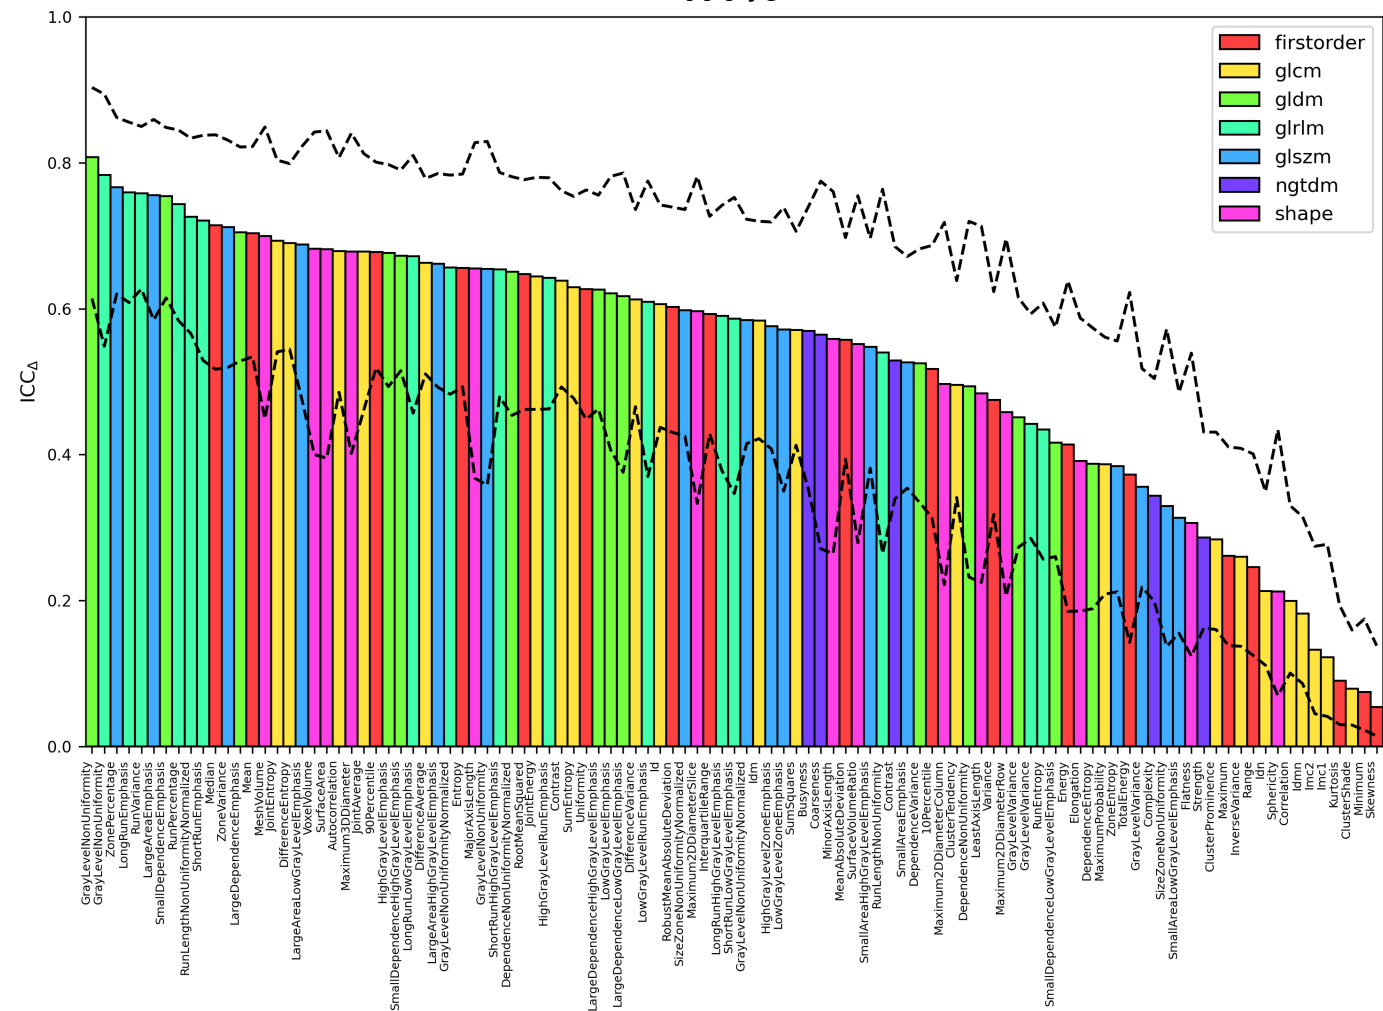

ADC

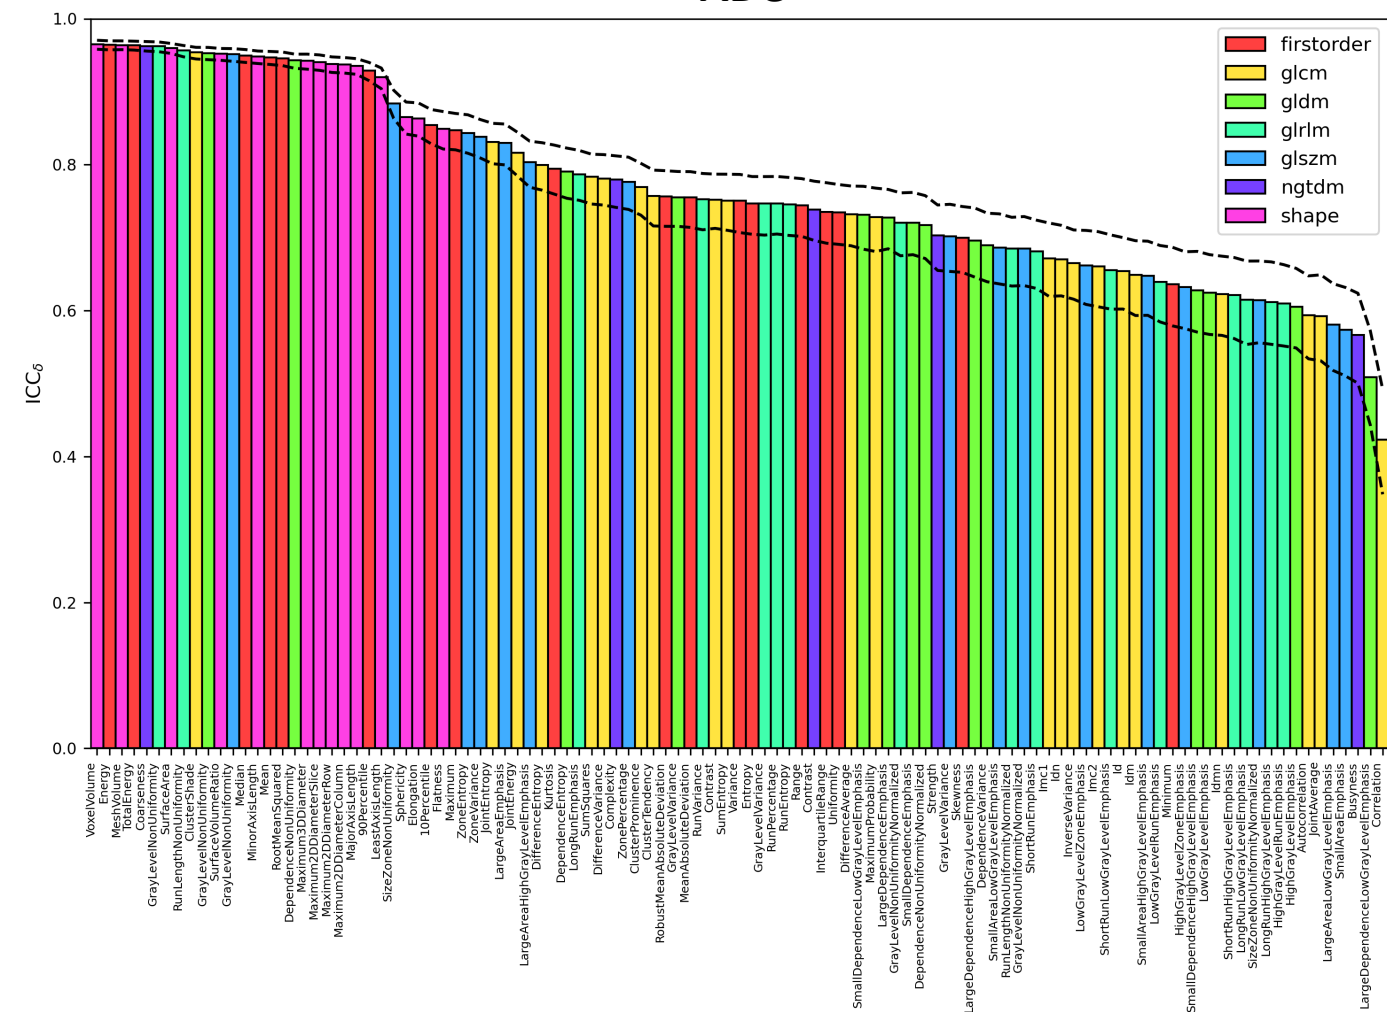

rFF%

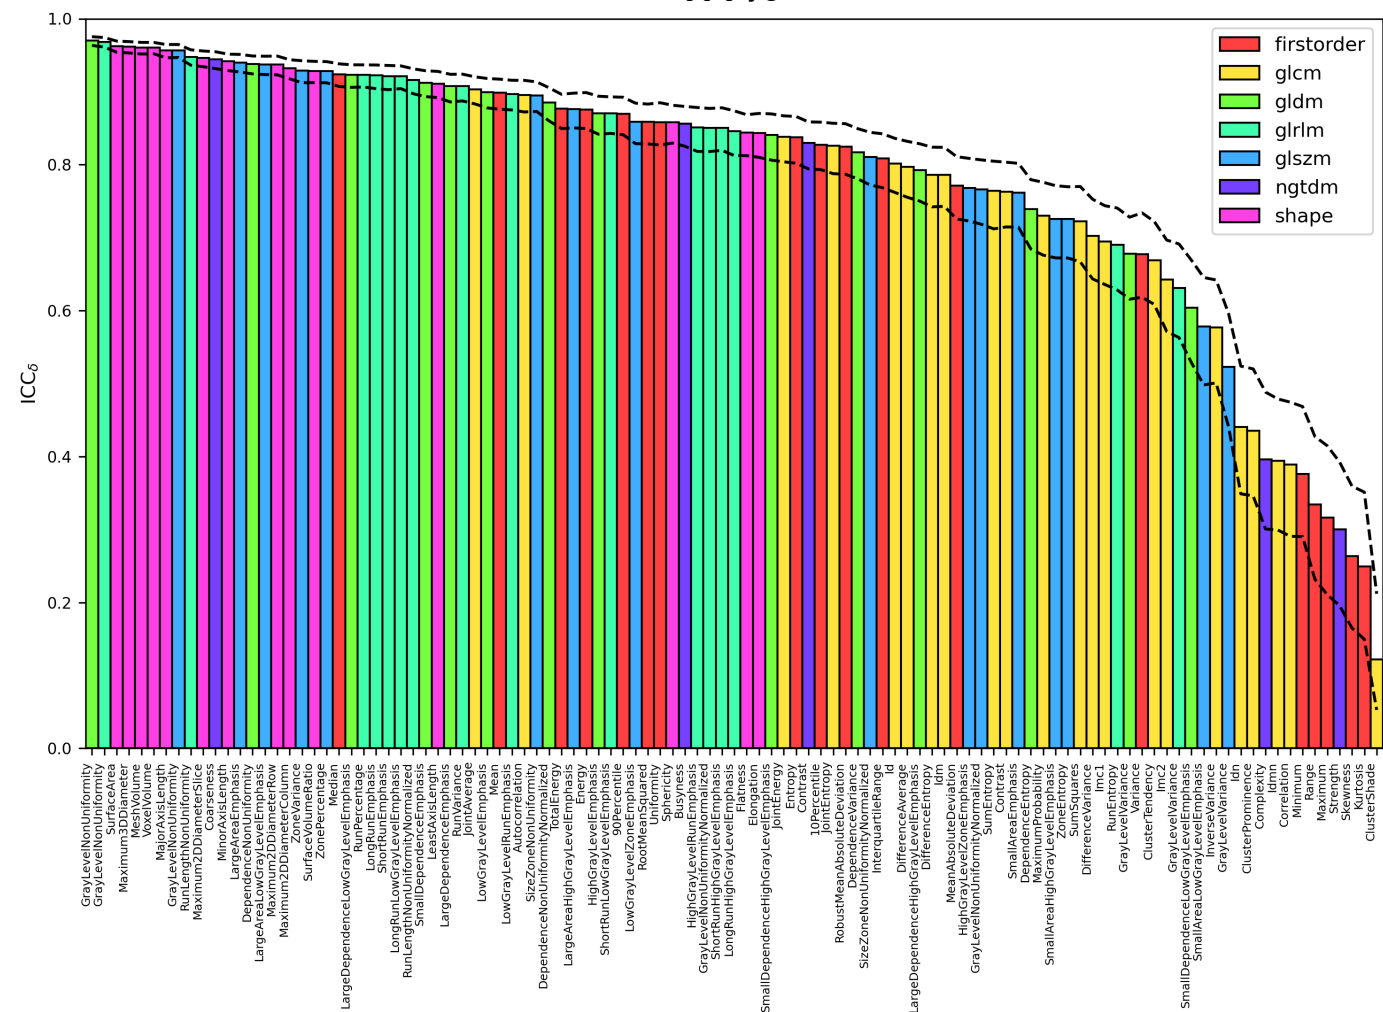

Supplement: s1 [file s1]
